# Supplementary material
Source: PubMed Central journal article supplement (PMC7272132)
Supplement: NIHMS1590626-supplement-Ray20-1-ESI.pdf [file NIHMS1590626-supplement-Ray20-1-ESI.pdf]

**BCl<sub>3</sub>-Activated Synthesis of COO-BODIPY Laser Dyes: General Scope and High Yields under Mild Conditions**

César Ray,<sup>†</sup> Christopher Schad,<sup>†</sup> Florencio Moreno,<sup>†</sup> Beatriz L. Maroto,<sup>†</sup> Jorge Bañuelos,<sup>‡,\*</sup> Teresa Arbeloa,<sup>‡</sup> Inmaculada García-Moreno,<sup>§</sup> Cassie Villafuerte,<sup>††</sup> Gilles Muller<sup>††</sup> and Santiago de la Moya<sup>†,\*</sup>

<sup>†</sup>Departamento de Química Orgánica, Facultad de Ciencias Químicas, Universidad Complutense de Madrid, Ciudad Universitaria s/n, 28040, Madrid, Spain.

<sup>‡</sup>Departamento de Química Física, Facultad de Ciencia y Tecnología, Universidad del País Vasco-EHU, 48080, Bilbao, Spain.

<sup>§</sup>Departamento de Sistemas de Baja Dimensionalidad, Superficies y Materia Condensada, Instituto de Química-Física Rocasolano, Centro Superior de Investigaciones Científicas (CSIC), Serrano 119, 28006 Madrid, Spain.

<sup>††</sup>Department of Chemistry, San José State University, One Washington Square, San José, CA 95192-0101, USA.

**Table of Contents**

|                                                                                                      |     |
|------------------------------------------------------------------------------------------------------|-----|
| 1. Photophysical and computational results. Table S1 and Figures S1-S4                               | S2  |
| 2. <sup>1</sup> H NMR spectra of known compounds                                                     | S6  |
| 3. <sup>1</sup> H, <sup>13</sup> C{ <sup>1</sup> H} and <sup>11</sup> B NMR spectra of new compounds | S10 |
| 4. Cartesian coordinates and computed energies. Tables S2-S3                                         | S33 |

## 1. Photophysical and computational results. Table S1 and Figures S1-S2

**Table S1.** Fluorescence signatures of the new *COO*-BODIPYs **11-21** in different solvents.

| Dye       | $\lambda_{ab}$<br>(nm) | $\epsilon_{max} 10^{-4}$<br>( $M^{-1} cm^{-1}$ ) | $\lambda_{fl}$<br>(nm) | $\phi$ | $\tau$<br>(ns) | $k_f 10^8$<br>( $s^{-1}$ ) | $k_{nr} 10^8$<br>( $s^{-1}$ ) |
|-----------|------------------------|--------------------------------------------------|------------------------|--------|----------------|----------------------------|-------------------------------|
| <b>11</b> |                        |                                                  |                        |        |                |                            |                               |
| c-hex     | 514                    | 8.2                                              | 521                    | 1.00   | 5.89           | 1.70                       | 0.00                          |
| EtOAc     | 512                    | 7.2                                              | 520                    | 1.00   | 6.46           | 1.55                       | 0.00                          |
| MeOH      | 512                    | 6.8                                              | 521                    | 1.00   | 6.91           | 1.45                       | 0.00                          |
| <b>12</b> |                        |                                                  |                        |        |                |                            |                               |
| c-hex     | 523                    | 8.6                                              | 540                    | 0.82   | 6.09           | 1.34                       | 0.29                          |
| EtOAc     | 519                    | 7.3                                              | 536                    | 0.80   | 6.31           | 1.27                       | 0.32                          |
| MeOH      | 519                    | 7.2                                              | 535                    | 0.82   | 6.96           | 1.18                       | 0.26                          |
| <b>13</b> |                        |                                                  |                        |        |                |                            |                               |
| c-hex     | 524                    | 6.5                                              | 541                    | 0.87   | 6.34           | 1.37                       | 0.20                          |
| EtOAc     | 521                    | 5.9                                              | 536                    | 0.80   | 7.02           | 1.14                       | 0.28                          |
| MeOH      | 520                    | 6.3                                              | 534                    | 0.82   | 7.55           | 1.09                       | 0.24                          |
| <b>14</b> |                        |                                                  |                        |        |                |                            |                               |
| c-hex     | 524                    | 8.2                                              | 540                    | 0.93   | 6.18           | 1.50                       | 0.11                          |
| EtOAc     | 520                    | 7.0                                              | 536                    | 0.92   | 6.84           | 1.35                       | 0.12                          |
| MeOH      | 520                    | 6.1                                              | 538                    | 0.86   | 7.43           | 1.16                       | 0.19                          |
| <b>15</b> |                        |                                                  |                        |        |                |                            |                               |
| c-hex     | 525                    | 7.8                                              | 540                    | 0.91   | 6.49           | 1.40                       | 0.14                          |
| EtOAc     | 521                    | 6.6                                              | 538                    | 0.95   | 6.84           | 1.39                       | 0.07                          |
| MeOH      | 520                    | 6.0                                              | 538                    | 0.87   | 7.43           | 1.17                       | 0.17                          |
| <b>16</b> |                        |                                                  |                        |        |                |                            |                               |
| c-hex     | 524                    | 7.9                                              | 540                    | 0.91   | 6.18           | 1.47                       | 0.14                          |
| EtOAc     | 520                    | 7.0                                              | 535                    | 0.90   | 6.49           | 1.39                       | 0.15                          |
| MeOH      | 519                    | 6.7                                              | 534                    | 0.87   | 7.01           | 1.24                       | 0.18                          |
| <b>17</b> |                        |                                                  |                        |        |                |                            |                               |
| c-hex     | 524                    | 7.7                                              | 541                    | 0.95   | 6.09           | 1.56                       | 0.08                          |
| EtOAc     | 520                    | 7.5                                              | 538                    | 0.85   | 6.60           | 1.29                       | 0.22                          |
| MeOH      | 520                    | 7.1                                              | 536                    | 0.71   | 6.03           | 1.18                       | 0.48                          |
| <b>18</b> |                        |                                                  |                        |        |                |                            |                               |
| c-hex     | 524                    | 7.6                                              | 540                    | 0.83   | 6.11           | 1.35                       | 0.28                          |
| EtOAc     | 520                    | 7.5                                              | 536                    | 0.80   | 6.45           | 1.24                       | 0.31                          |
| MeOH      | 520                    | 7.3                                              | 535                    | 0.83   | 6.99           | 1.19                       | 0.24                          |
| <b>19</b> |                        |                                                  |                        |        |                |                            |                               |
| c-hex     | 524                    | 7.0                                              | 540                    | 0.89   | 6.24           | 1.43                       | 0.17                          |
| EtOAc     | 521                    | 6.2                                              | 544                    | 0.01   | 0.05           | 2.80                       | 197                           |
| MeOH      | 520                    | 6.1                                              | 542                    | 0.00   | -              | -                          | -                             |
| <b>20</b> |                        |                                                  |                        |        |                |                            |                               |
| c-hex     | 528                    | 5.5                                              | 571                    | 0.49   | 5.45           | 0.90                       | 0.93                          |
| EtOAc     | 522                    | 5.3                                              | 562                    | 0.51   | 5.73           | 0.89                       | 0.85                          |
| MeOH      | 521                    | 5.1                                              | 559                    | 0.53   | 5.61           | 0.94                       | 0.84                          |

| 21    |     |     |     |      |      |      |      |
|-------|-----|-----|-----|------|------|------|------|
| c-hex | 527 | 6.4 | 566 | 0.54 | 5.64 | 0.96 | 0.81 |
| EtOAc | 521 | 5.5 | 559 | 0.59 | 6.07 | 0.97 | 0.67 |
| MeOH  | 521 | 5.5 | 557 | 0.53 | 6.07 | 0.87 | 0.77 |

Maximum absorption ( $\lambda_{ab}$ ) and fluorescence ( $\lambda_{fl}$ ) wavelengths; maximum molar absorption ( $\epsilon_{max}$ ); fluorescence quantum yield ( $\phi$ ) and lifetime ( $\tau$ ); radiative ( $k_{fl}$ ) and non-radiative ( $k_{nr}$ ) rate constants. c-hex: cyclohexane; EtOAc: ethyl acetate; MeOH: methanol.

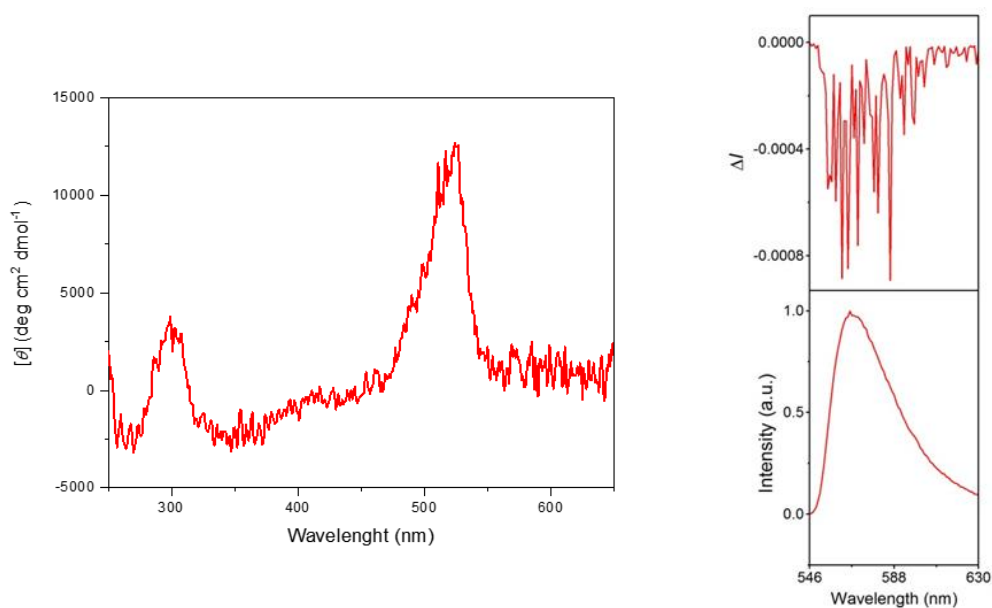

**Figure S1.** CD (left), CPL (right, up) and total luminescence (right, down) spectra of COO-BODIPY **13** in chloroform.

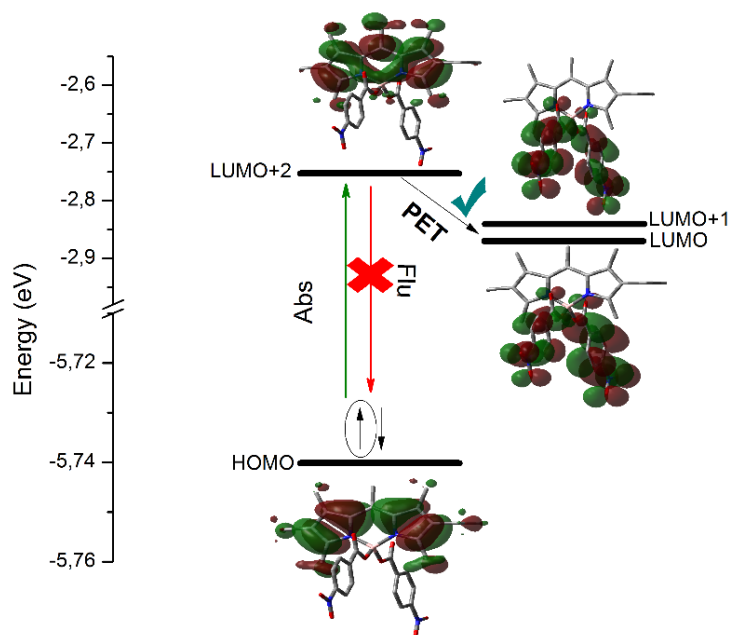

**Figure S2.** Energetic distribution of key molecular orbitals computed for the optimized ground-state geometry (PCM-B3LYP/6-311g\*) of COO-BODIPY **19** (see Table S3), and schematic representation of the fluorescence quenching by oxidative PET.

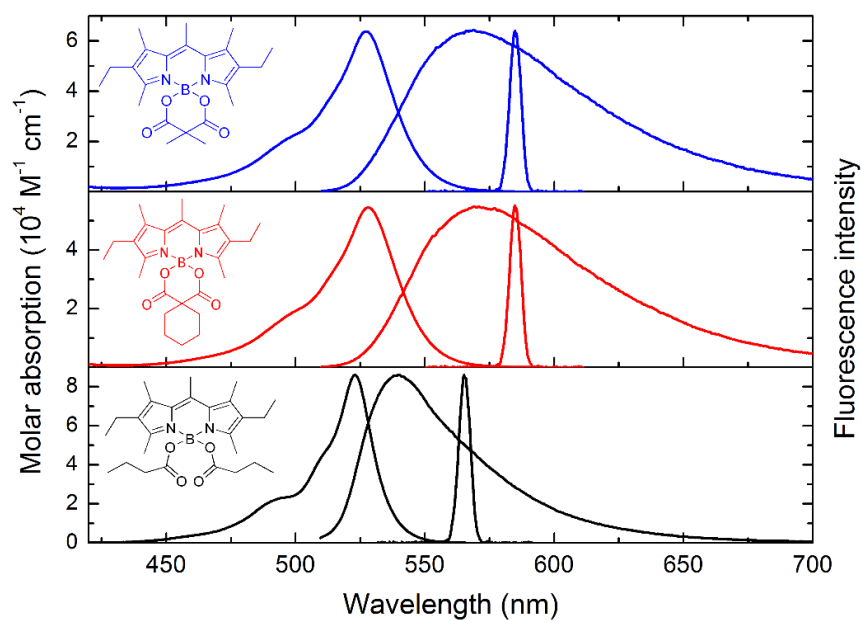

**Figure S3.** Absorption and corresponding normalized fluorescence and laser spectra of spiranic COO-BODIPYs **20** (in red) and **21** (in blue) in ethyl acetate. The corresponding spectra of **12** (in black) are shown in this figure, as a representative non-spiranic COO-BODIPY, for comparison.

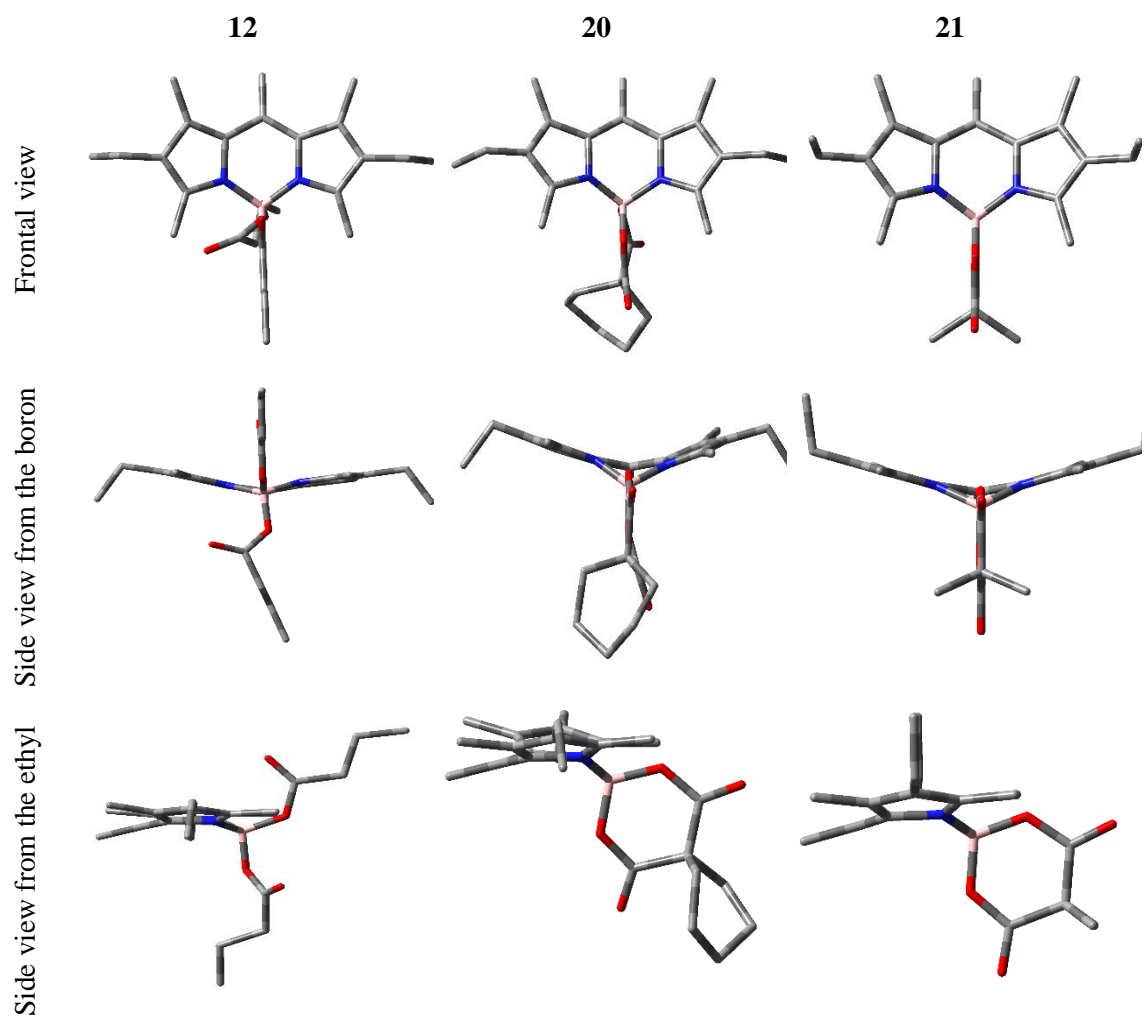

**Figure S4.** Optimized geometries at the first singlet excited state (TD-PCM-B3LYP/6-311g\*) in different views for spiranic COO-BODIPYs **20** and **21** with respect to non-spiranic analog **12** (see Table S2), highlighting the geometrical distortion in the former dyes.

## 2. $^1\text{H}$ NMR spectra of known compounds

### $^1\text{H}$ NMR (300 MHz, $\text{CDCl}_3$ )

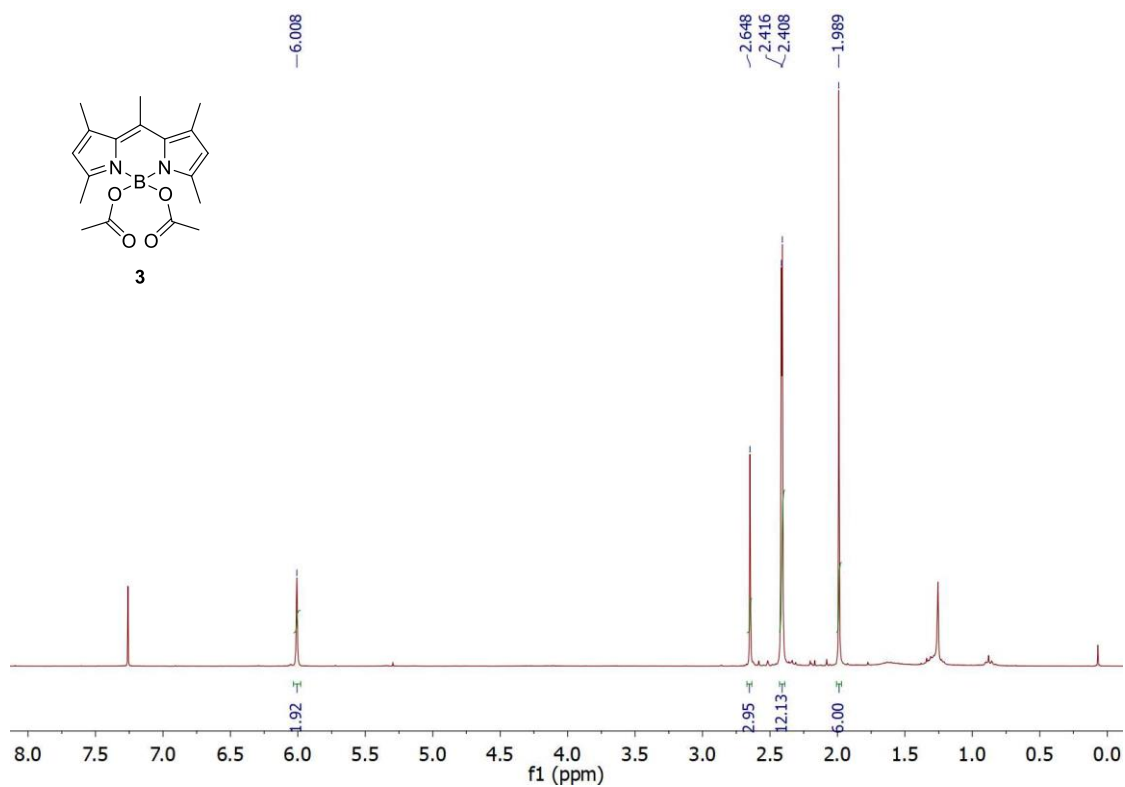

### $^1\text{H}$ NMR (300 MHz, $\text{CDCl}_3$ )

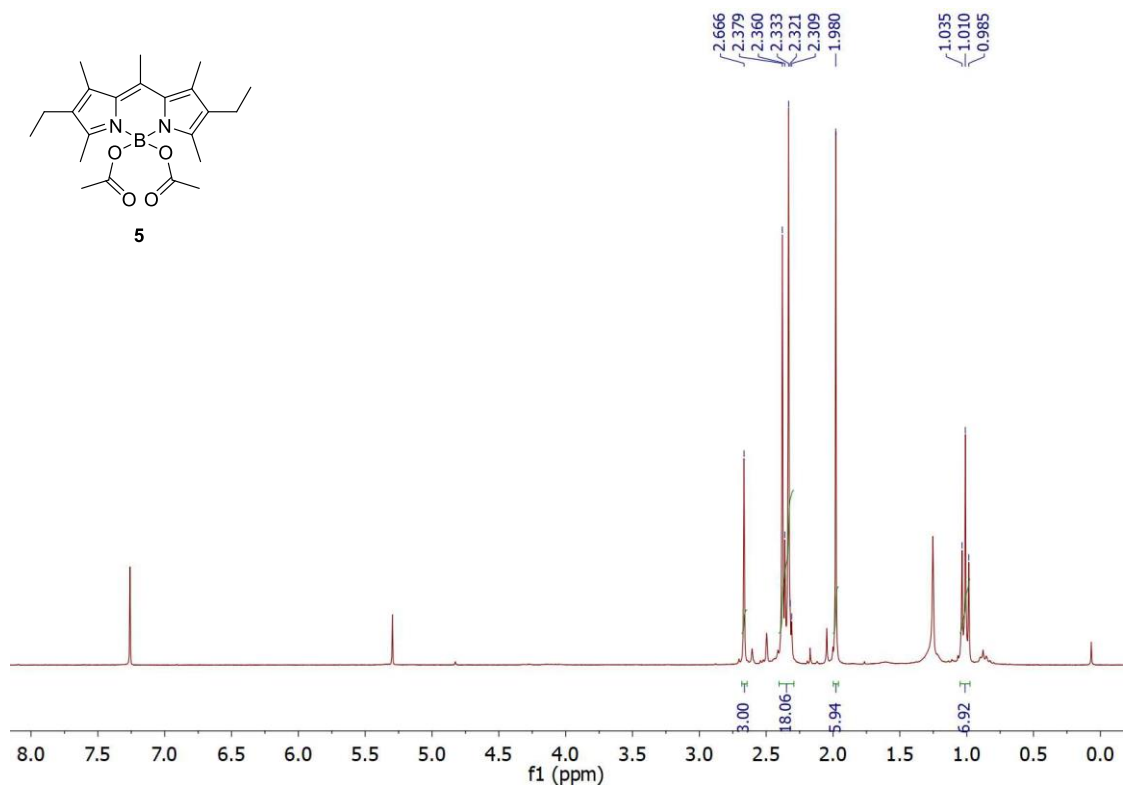

**<sup>1</sup>H NMR (300 MHz, CDCl<sub>3</sub>)**

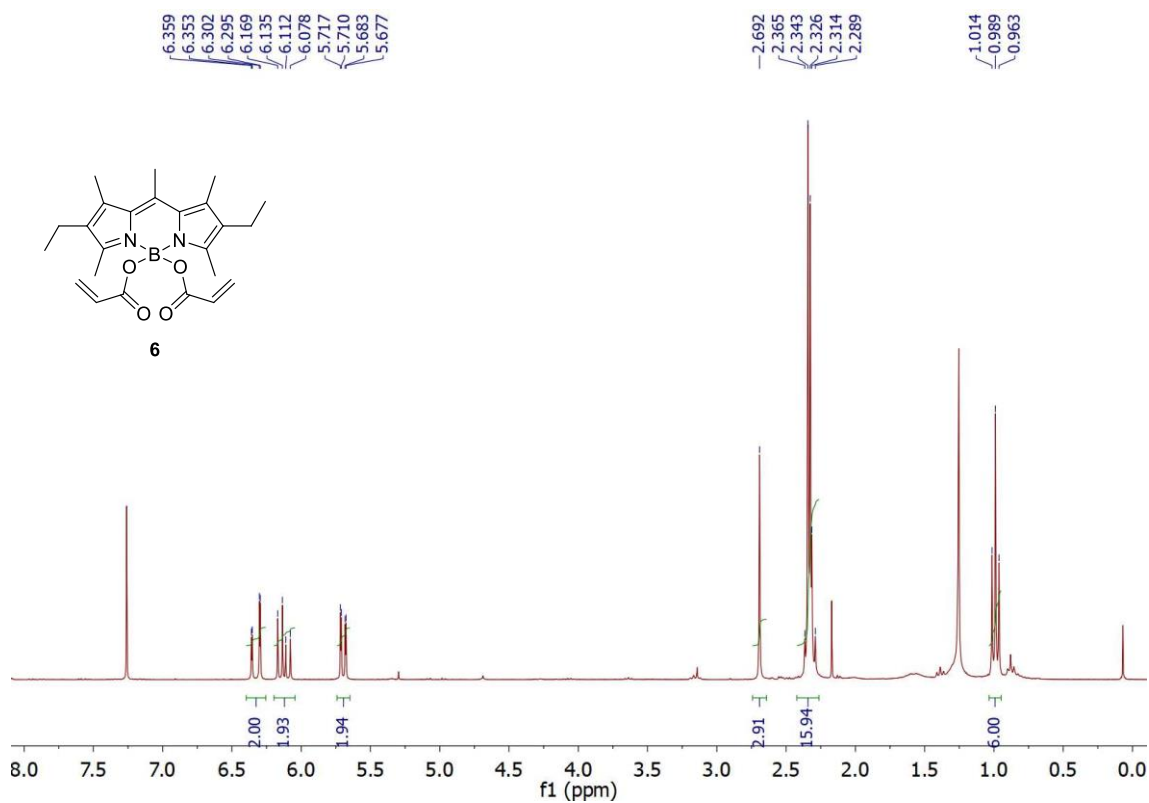

**<sup>1</sup>H NMR (300 MHz, CDCl<sub>3</sub>)**

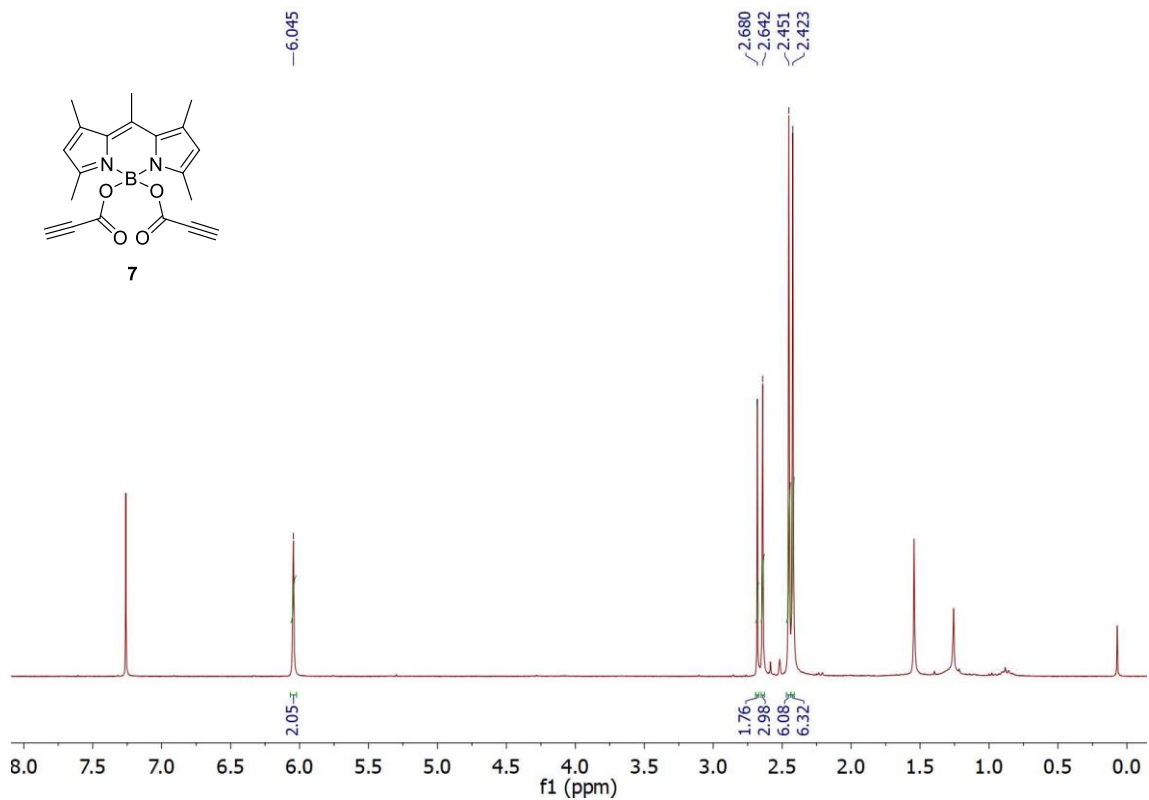

<sup>1</sup>H NMR (300 MHz, CDCl<sub>3</sub>)

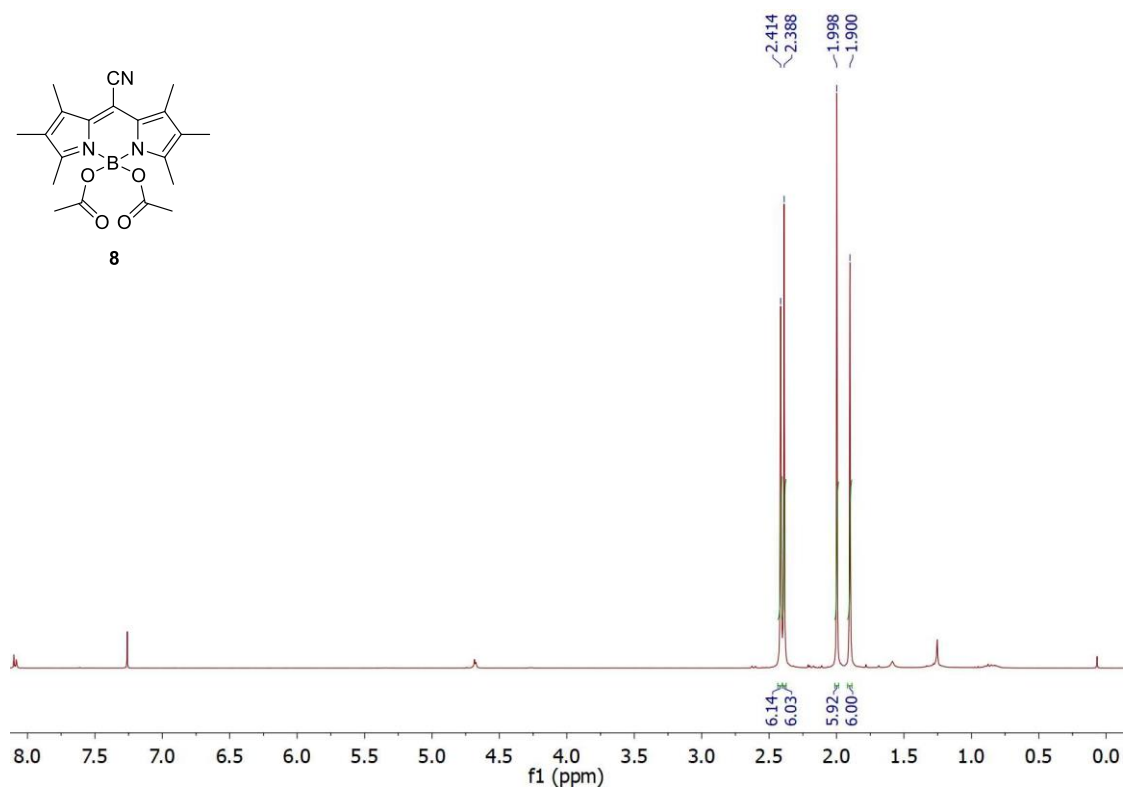

<sup>1</sup>H NMR (300 MHz, CDCl<sub>3</sub>)

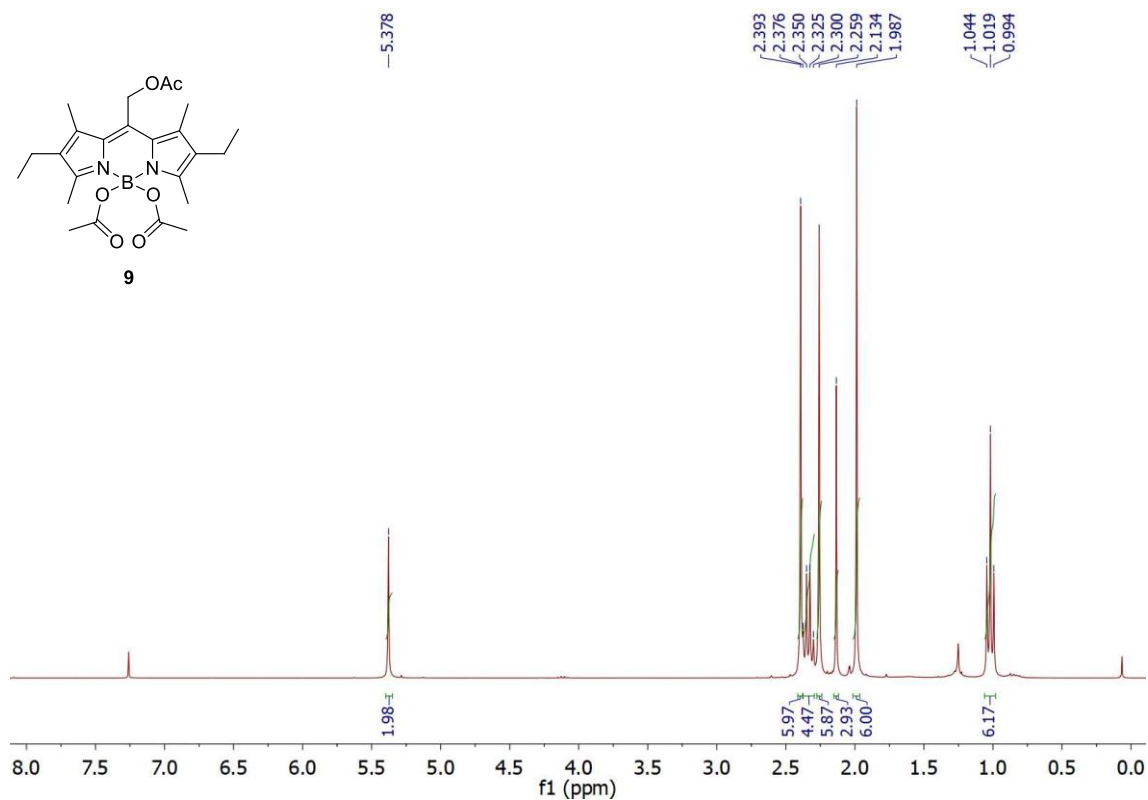



**<sup>1</sup>H NMR (300 MHz, CDCl<sub>3</sub>)**

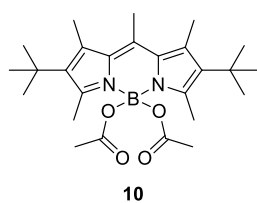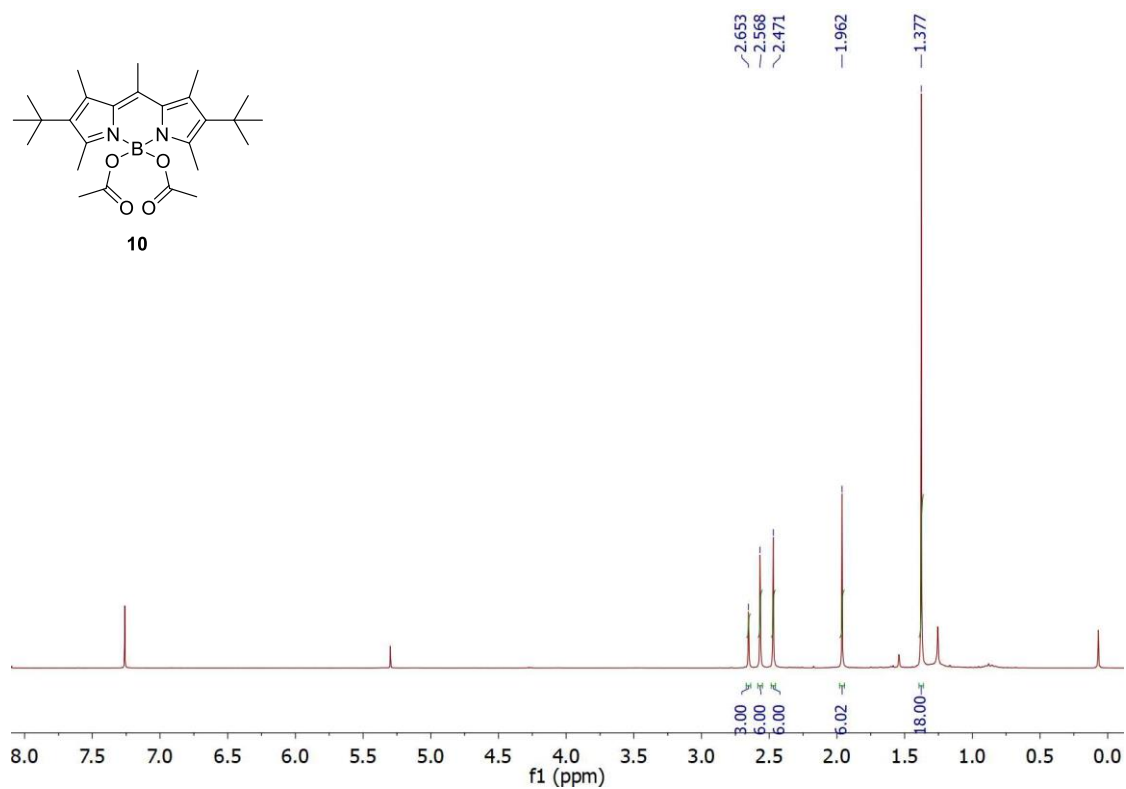

### 3. $^1\text{H}$ , $^{13}\text{C}\{^1\text{H}\}$ and $^{11}\text{B}$ NMR spectra of new compounds

#### $^1\text{H}$ NMR (300 MHz, $\text{CDCl}_3$ )

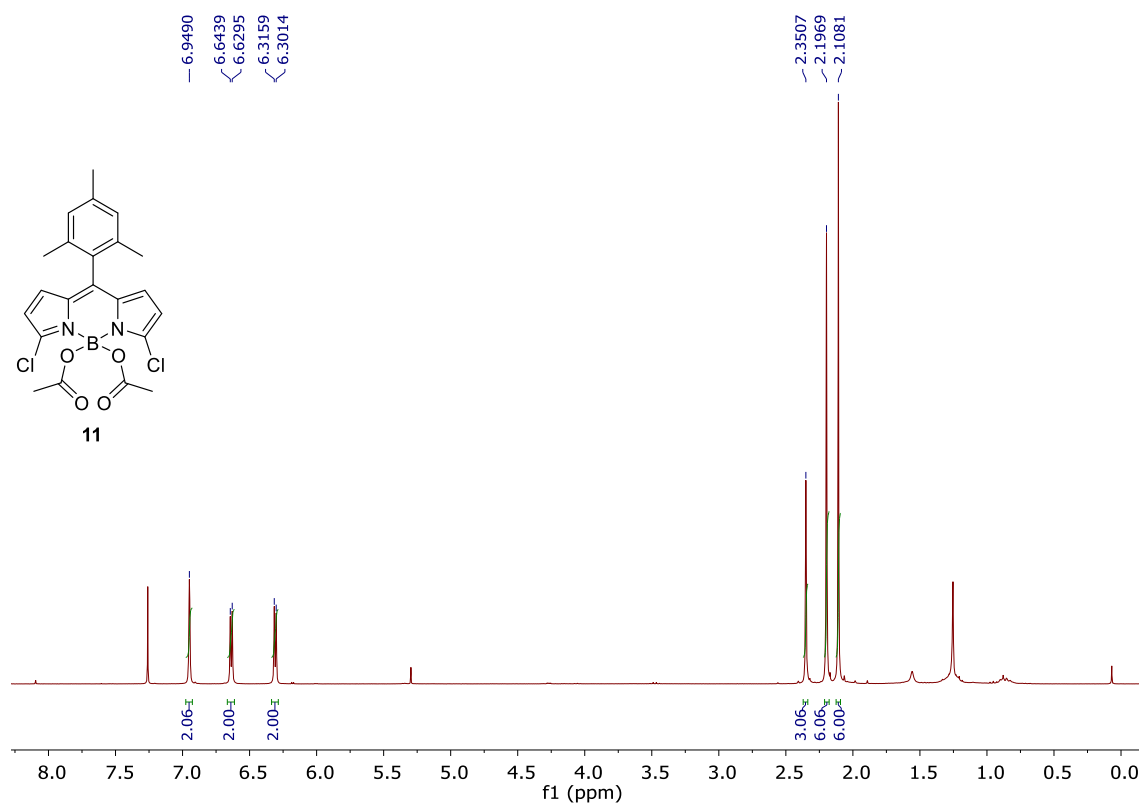

#### $^{13}\text{C}\{^1\text{H}\}$ NMR (75 MHz, $\text{CDCl}_3$ )

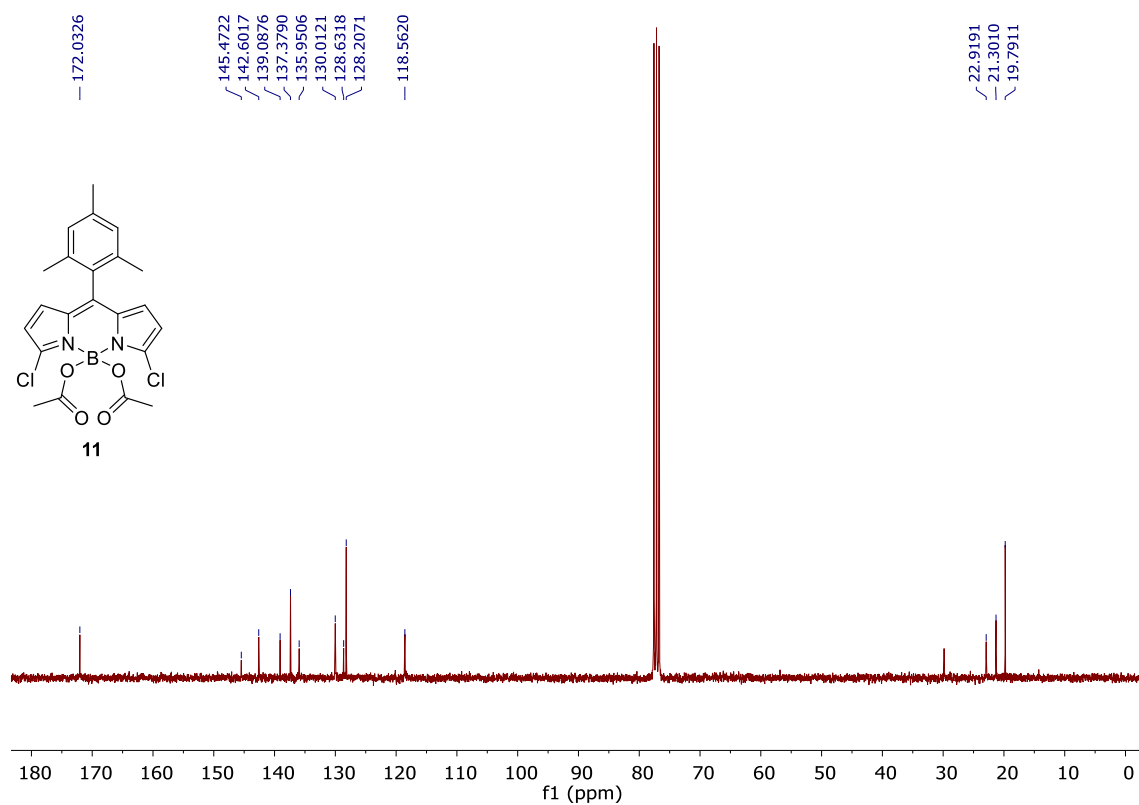

**$^{11}\text{B}$  NMR (160 MHz,  $\text{CDCl}_3$ )**

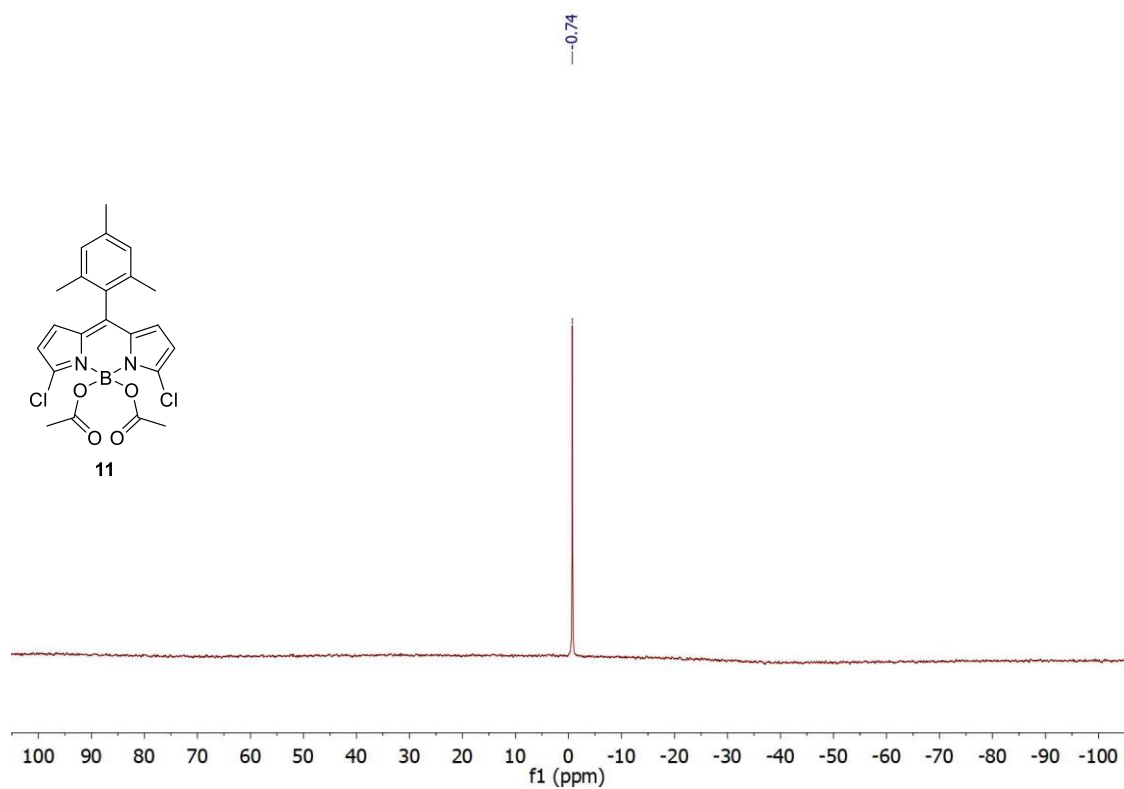

**<sup>1</sup>H NMR (500 MHz, CDCl<sub>3</sub>)**

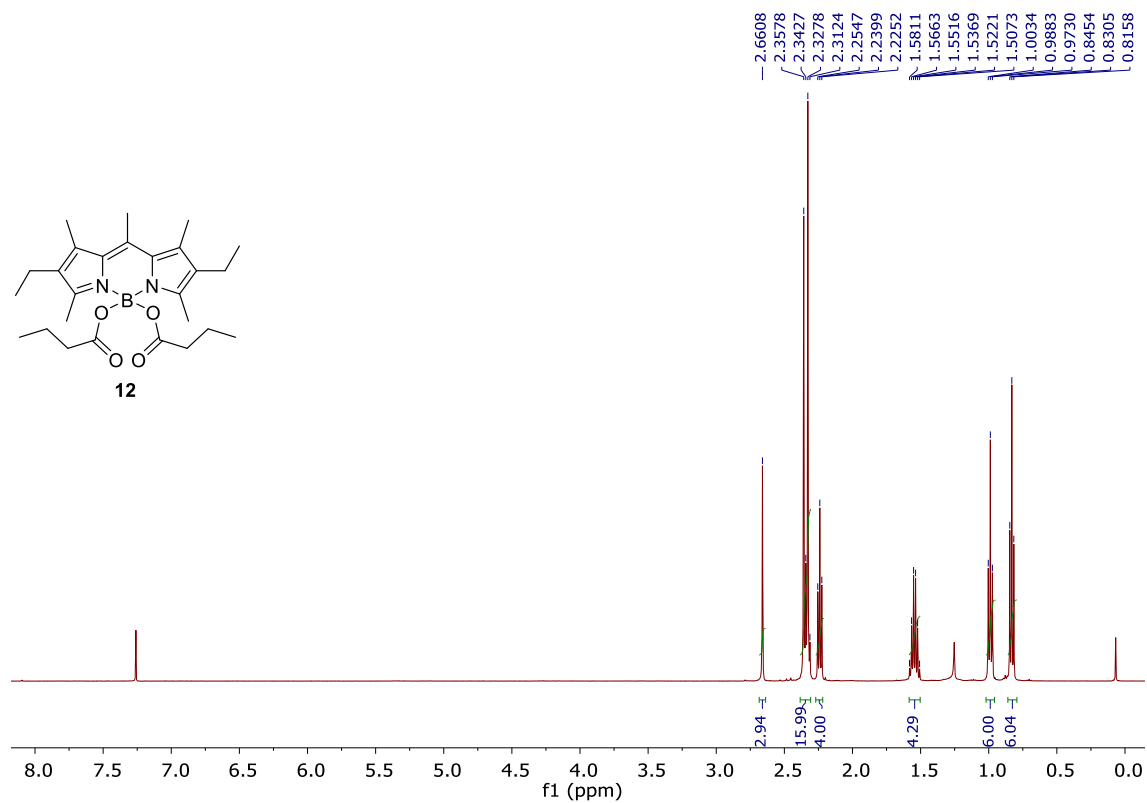

**<sup>13</sup>C{<sup>1</sup>H} NMR (75 MHz, CDCl<sub>3</sub>)**

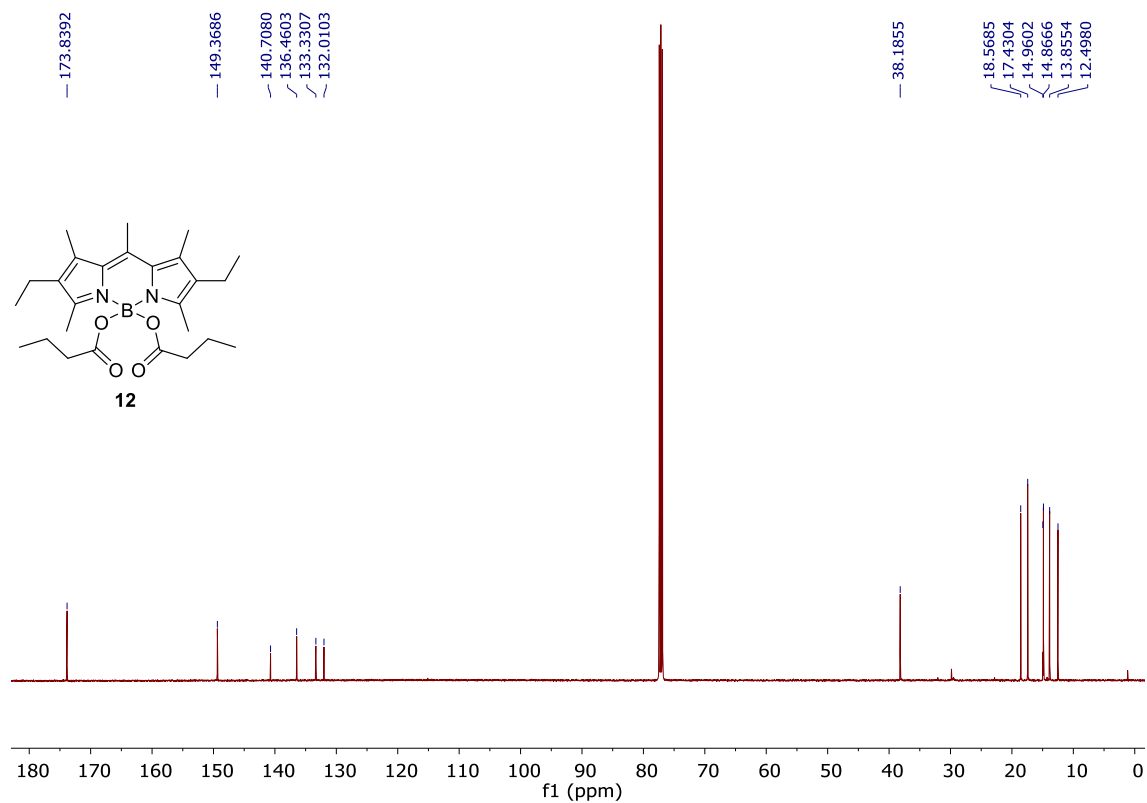

**$^{11}\text{B}$  NMR (160 MHz,  $\text{CDCl}_3$ )**

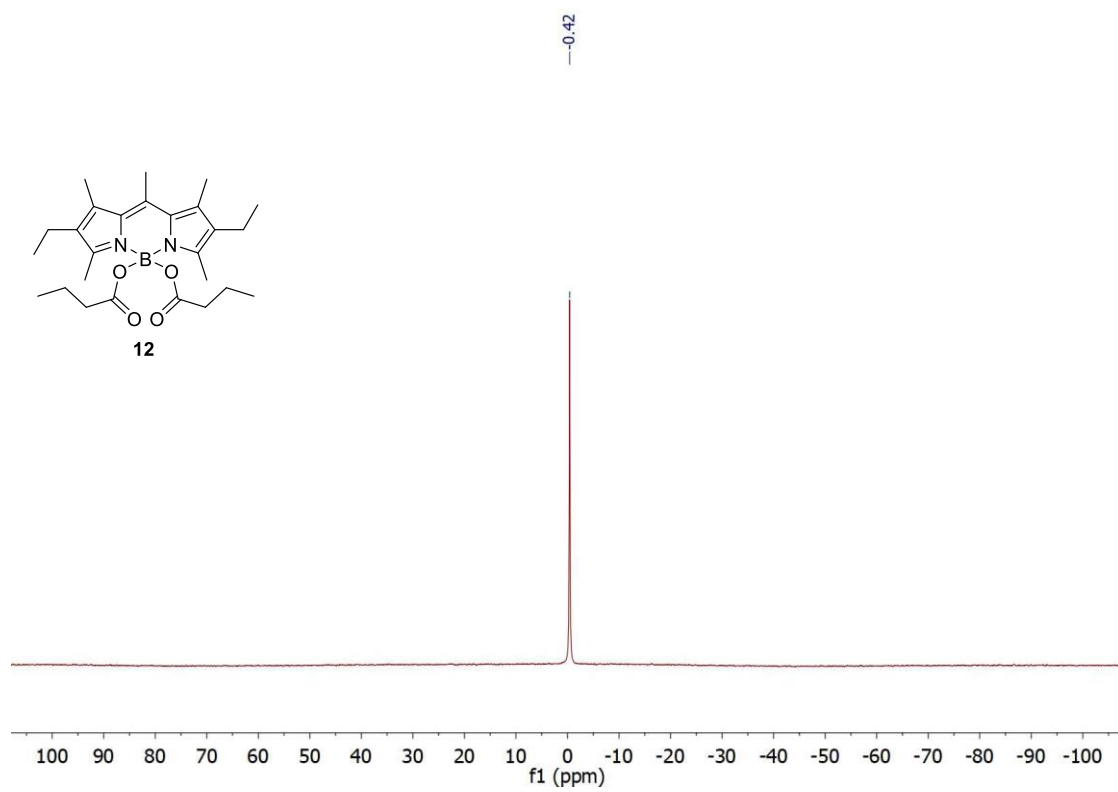

### $^1\text{H}$ NMR (500 MHz, $\text{CDCl}_3$ )

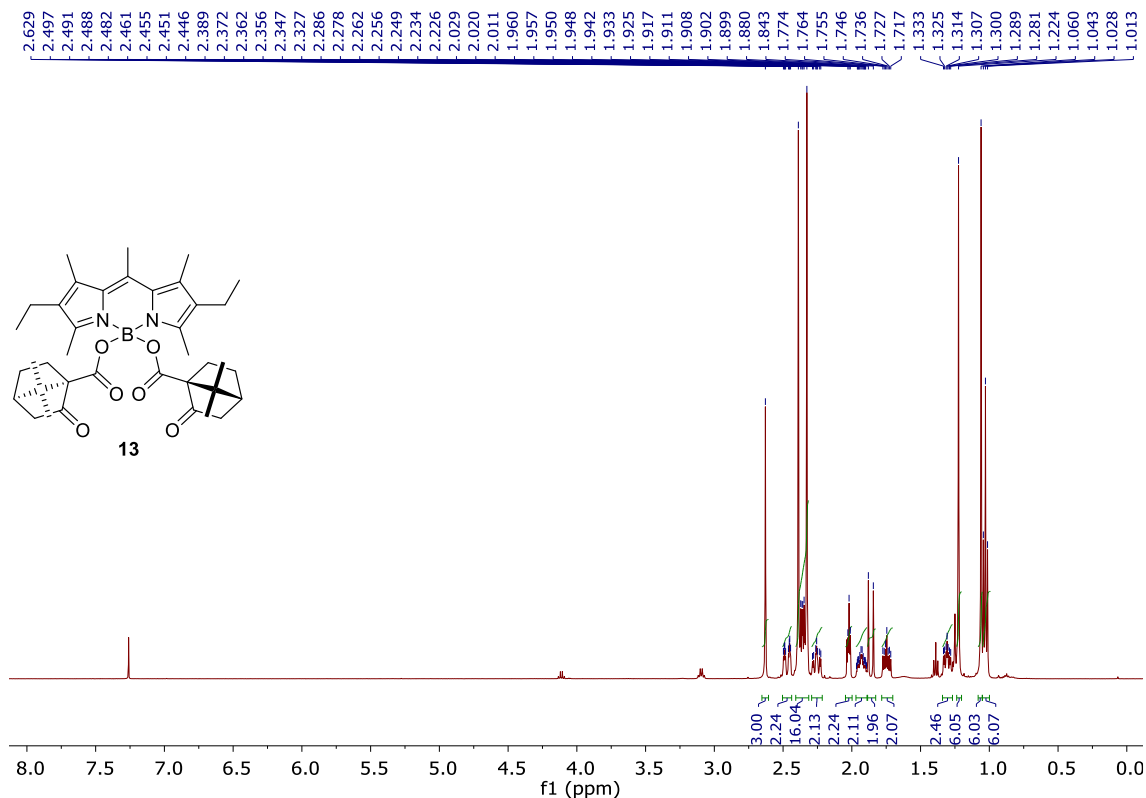

### $^{13}\text{C}\{^1\text{H}\}$ NMR (75 MHz, $\text{CDCl}_3$ )

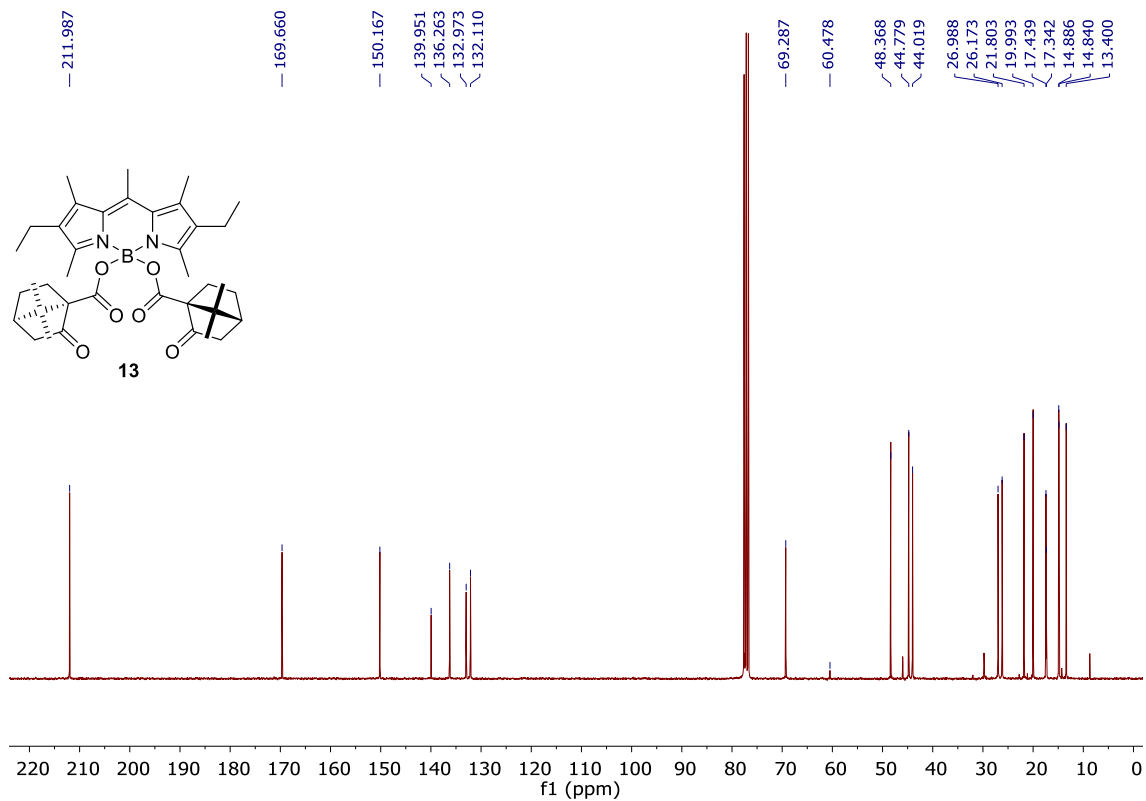

**$^{11}\text{B}$  NMR (160 MHz,  $\text{CDCl}_3$ )**

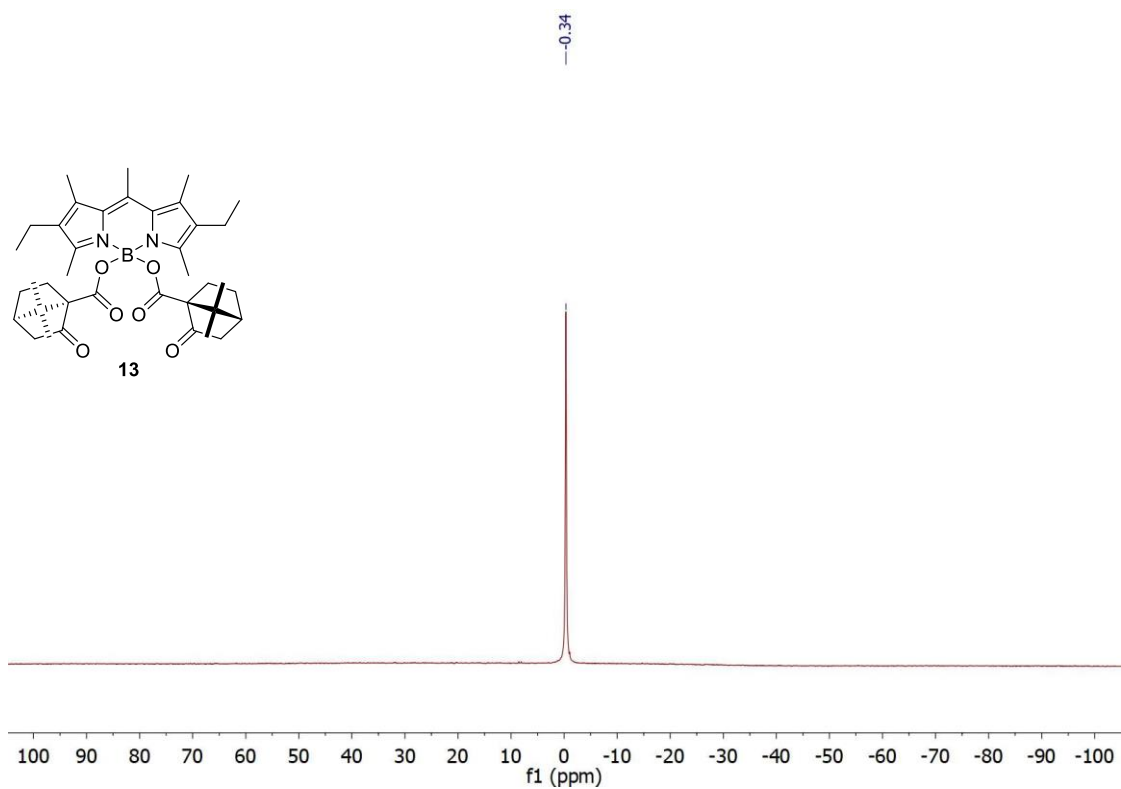

**$^1\text{H}$  NMR (300 MHz,  $\text{CDCl}_3$ )**

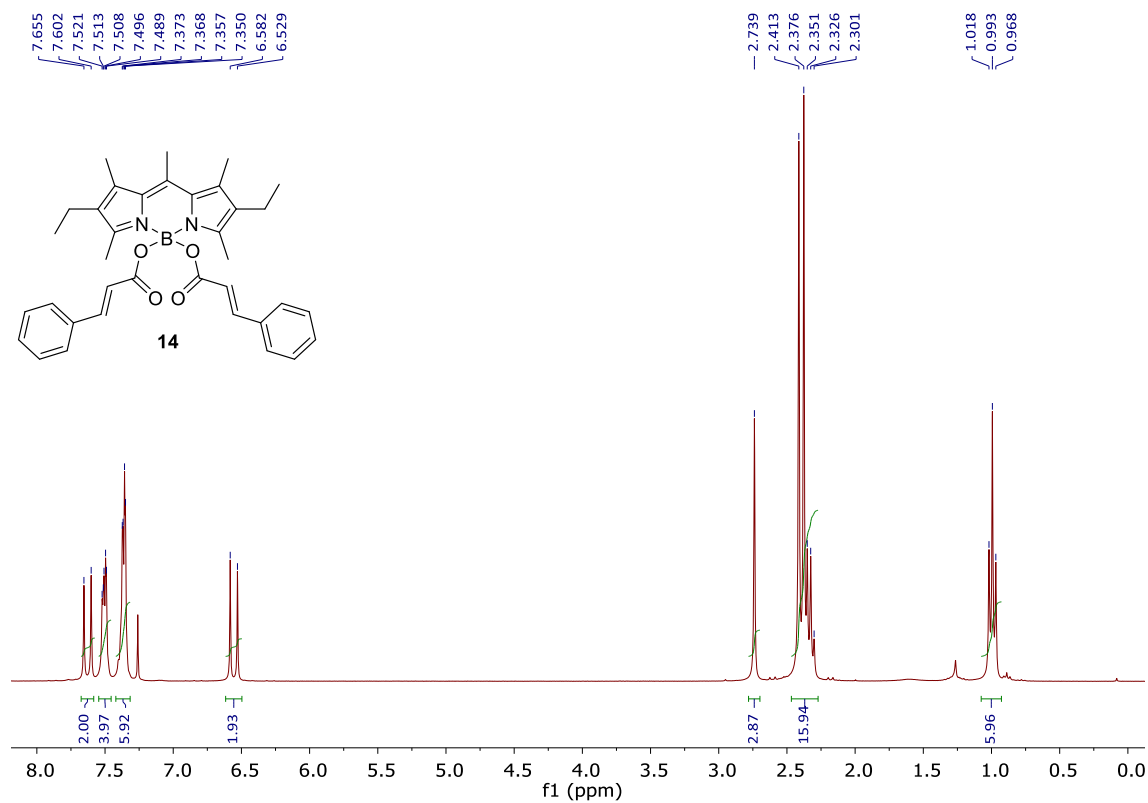

**$^{13}\text{C}\{^1\text{H}\}$  NMR (75 MHz,  $\text{CDCl}_3$ )**

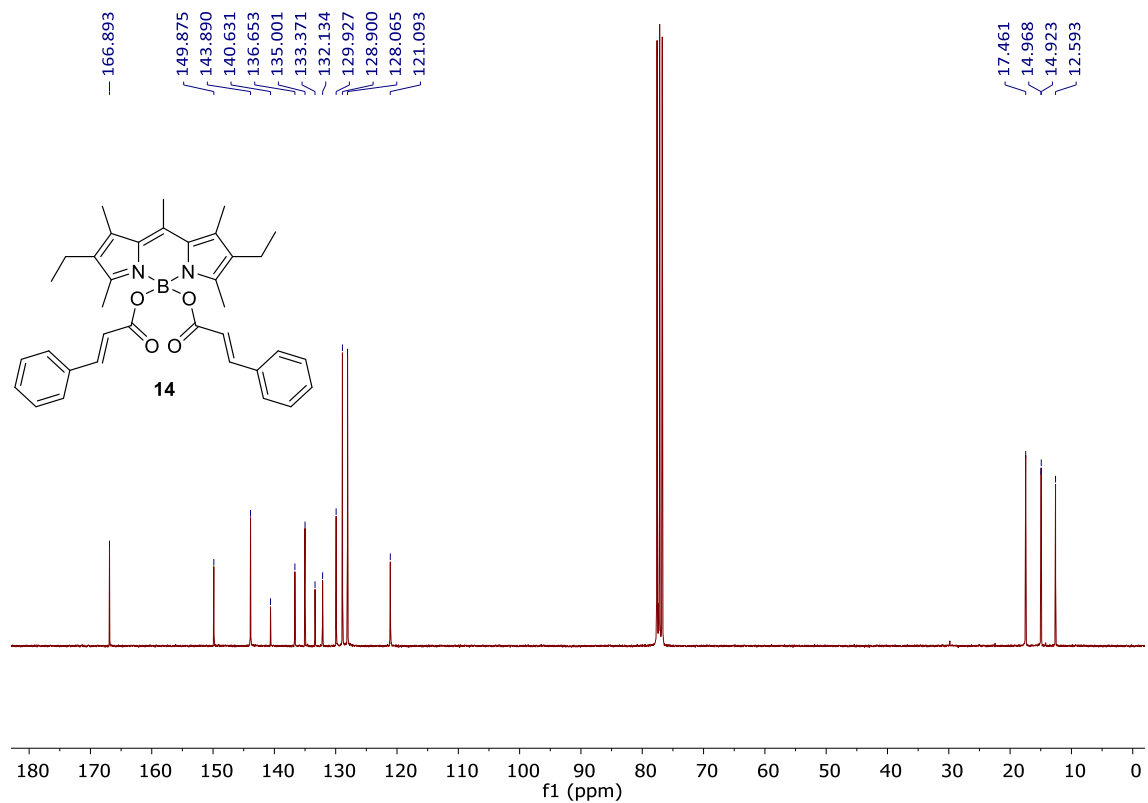



**$^{11}\text{B}$  NMR (160 MHz,  $\text{CDCl}_3$ )**

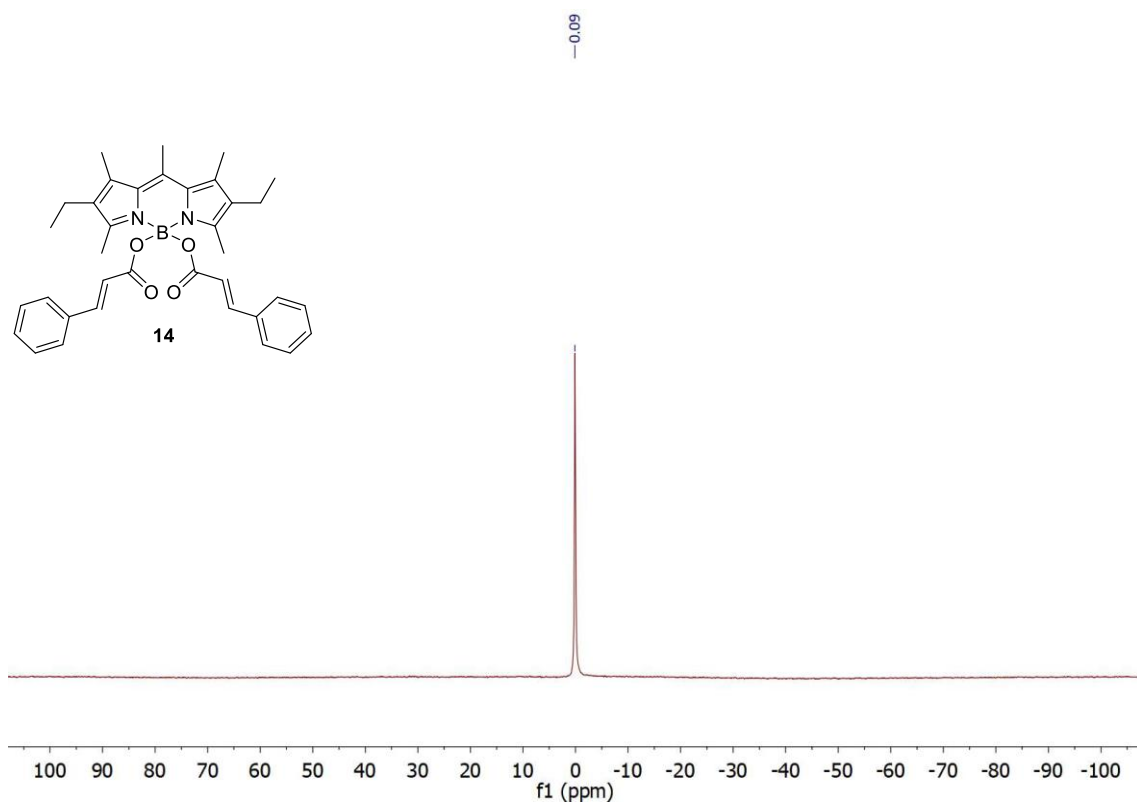

**$^1\text{H}$  NMR (300 MHz,  $\text{CDCl}_3$ )**

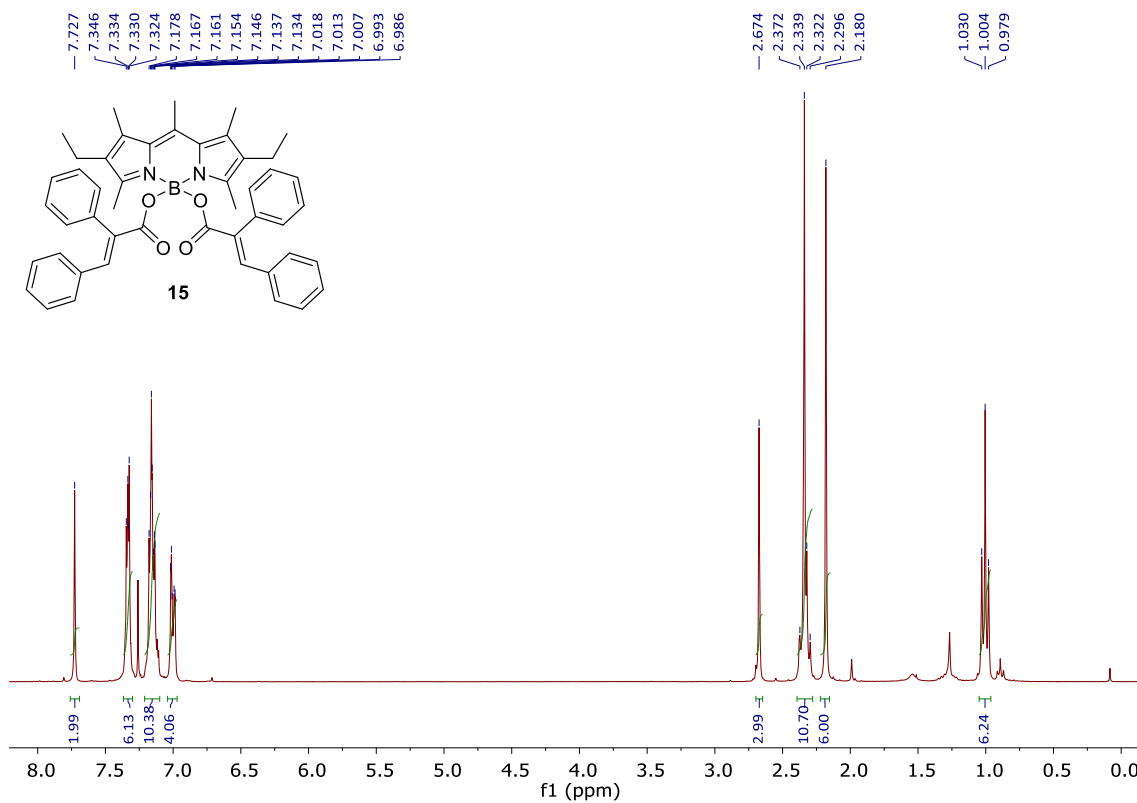

**$^{13}\text{C}\{^1\text{H}\}$  NMR (75 MHz,  $\text{CDCl}_3$ )**

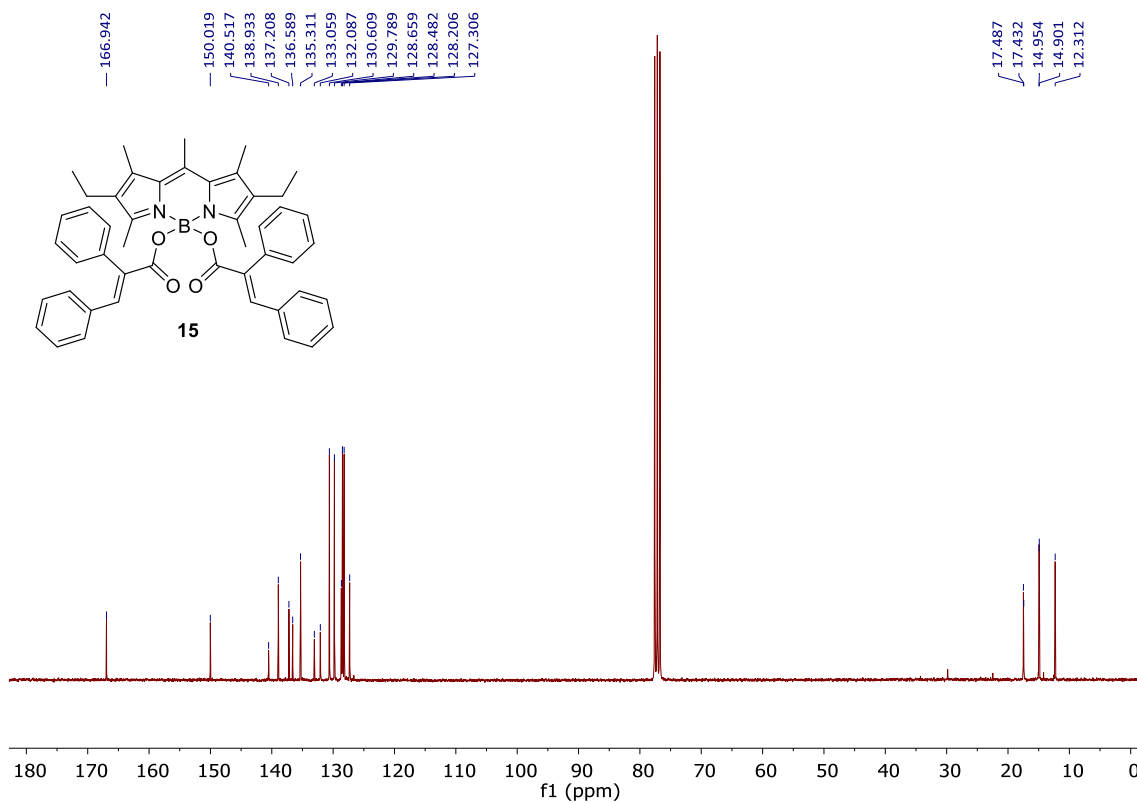

**$^{11}\text{B}$  NMR (160 MHz,  $\text{CDCl}_3$ )**

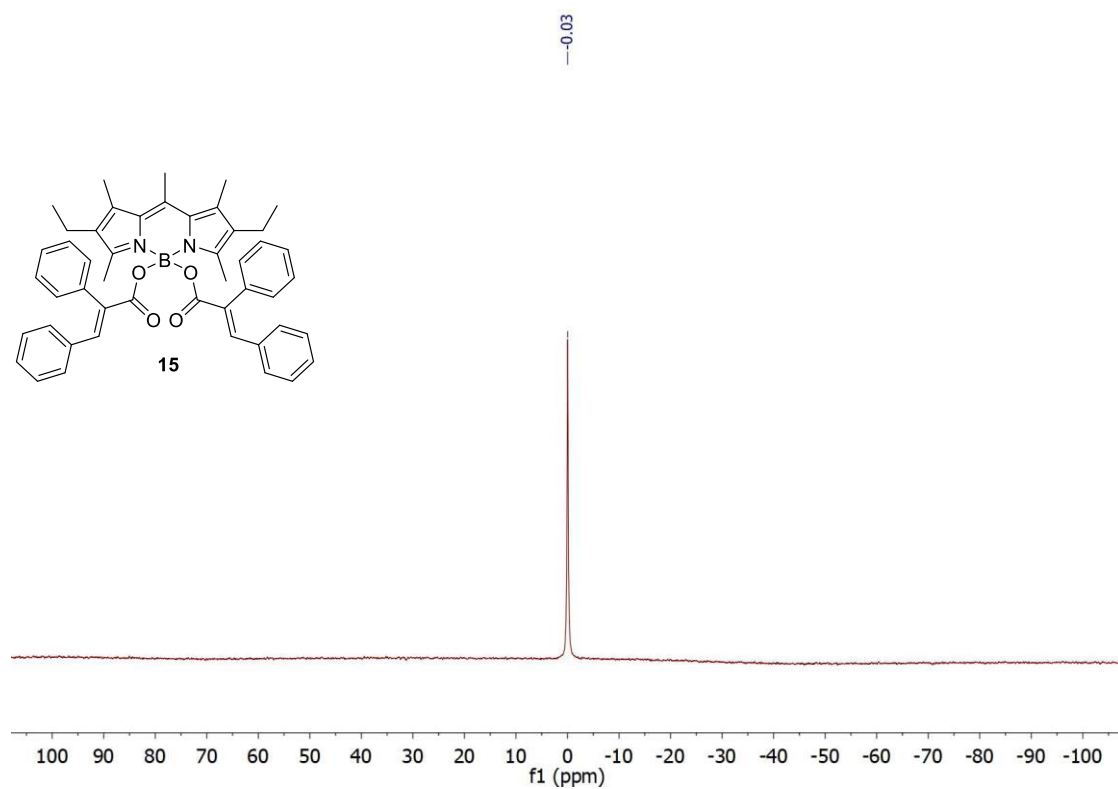

**<sup>1</sup>H NMR (300 MHz, CDCl<sub>3</sub>)**

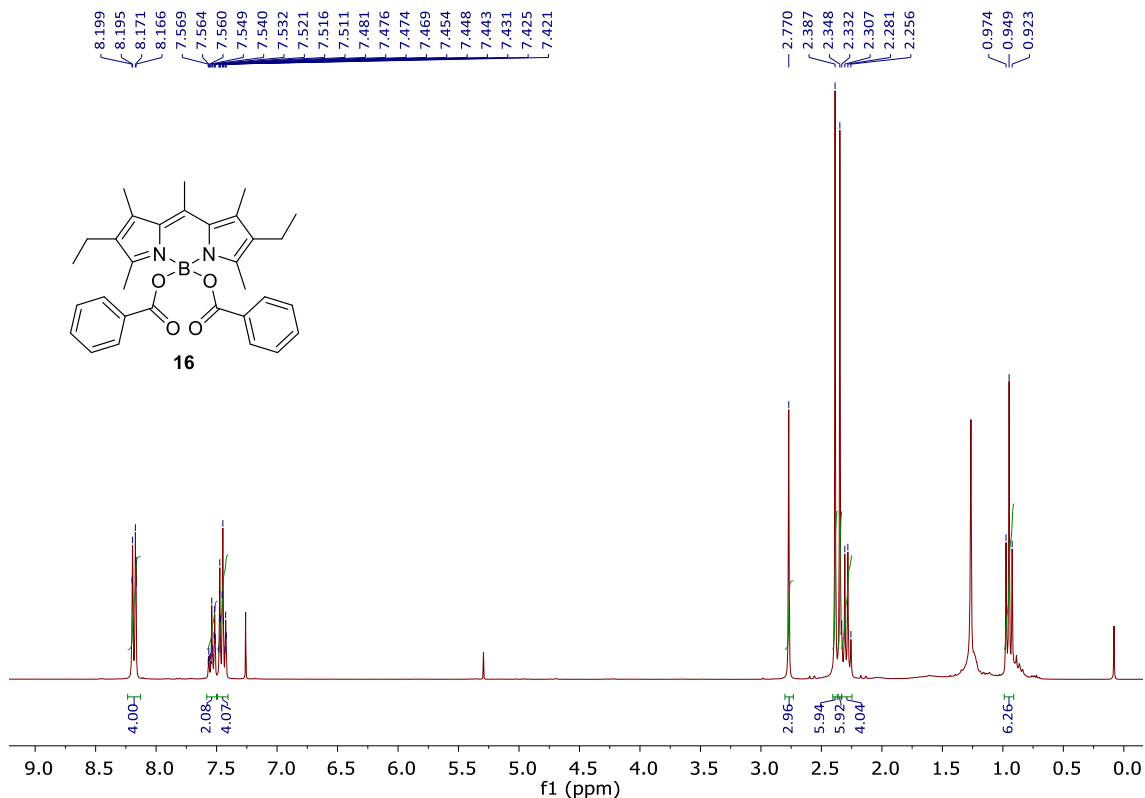

**<sup>13</sup>C{<sup>1</sup>H} NMR (75 MHz, CDCl<sub>3</sub>)**

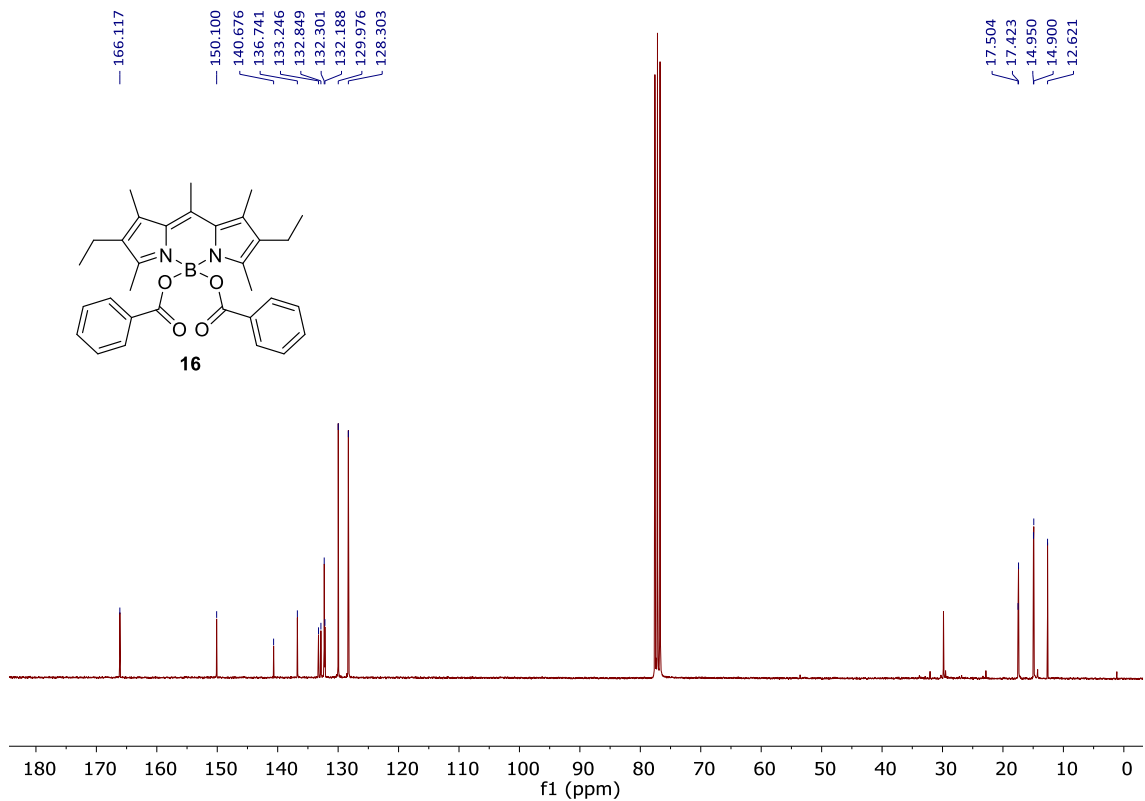

**$^{11}\text{B}$  NMR (160 MHz,  $\text{CDCl}_3$ )**

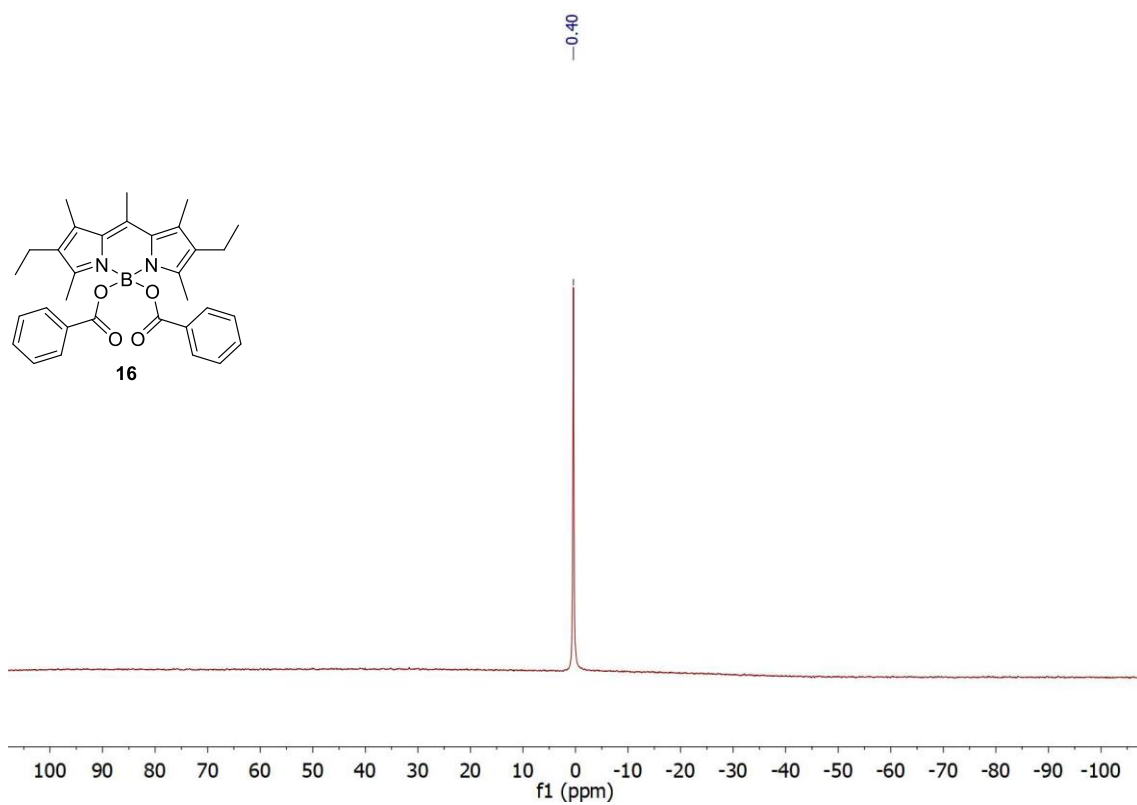

**<sup>1</sup>H NMR (300 MHz, CDCl<sub>3</sub>)**

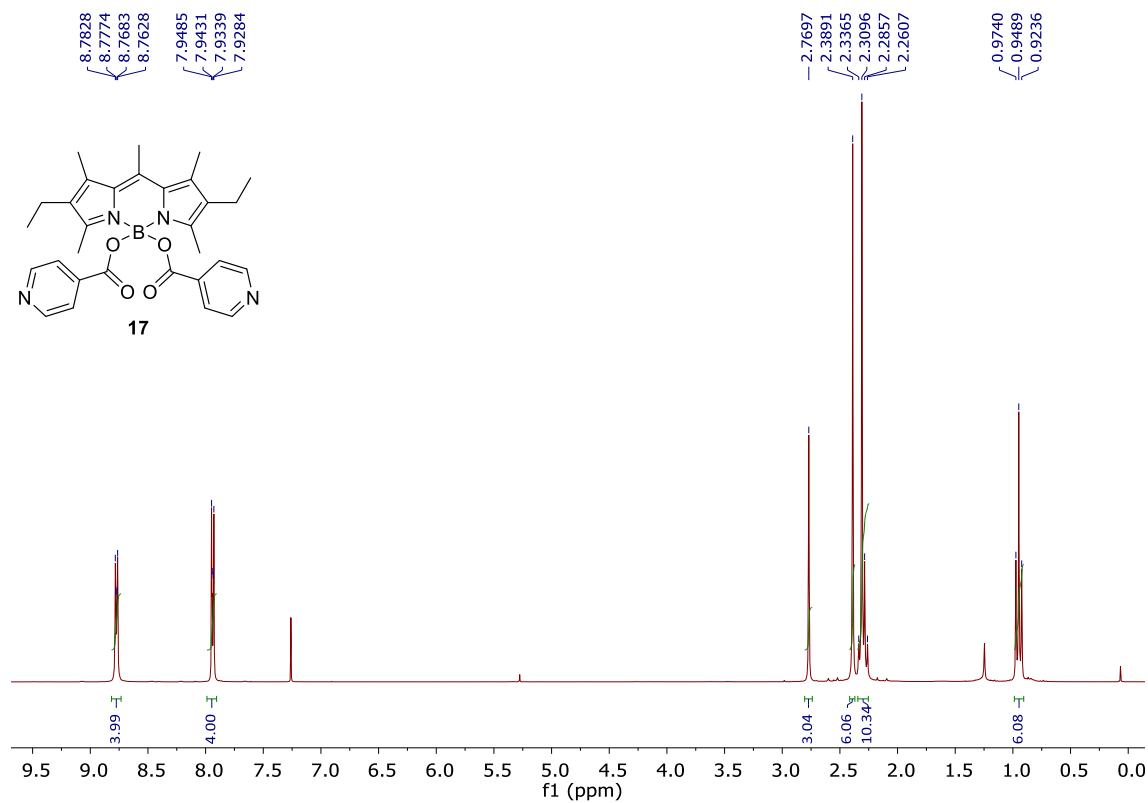

**<sup>13</sup>C**

**} NMR (75 MHz, CDCl<sub>3</sub>)**

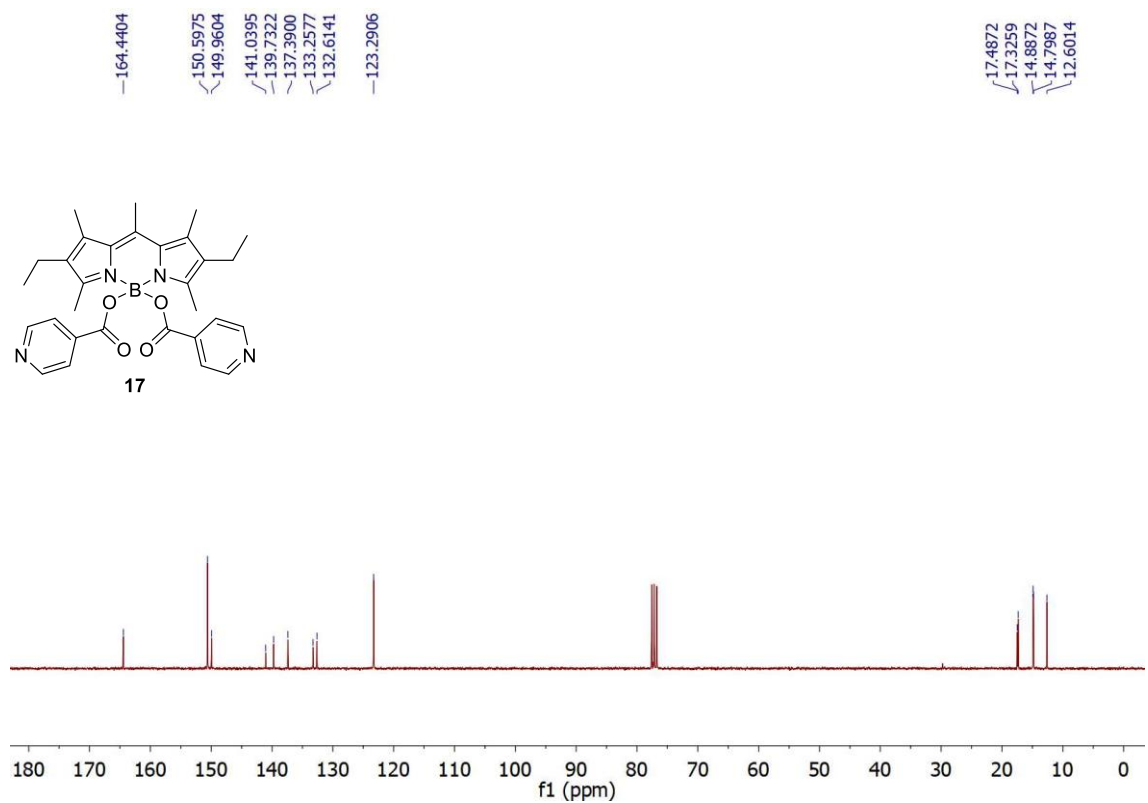



$^{11}\text{B}$  NMR (160 MHz,  $\text{CDCl}_3$ )

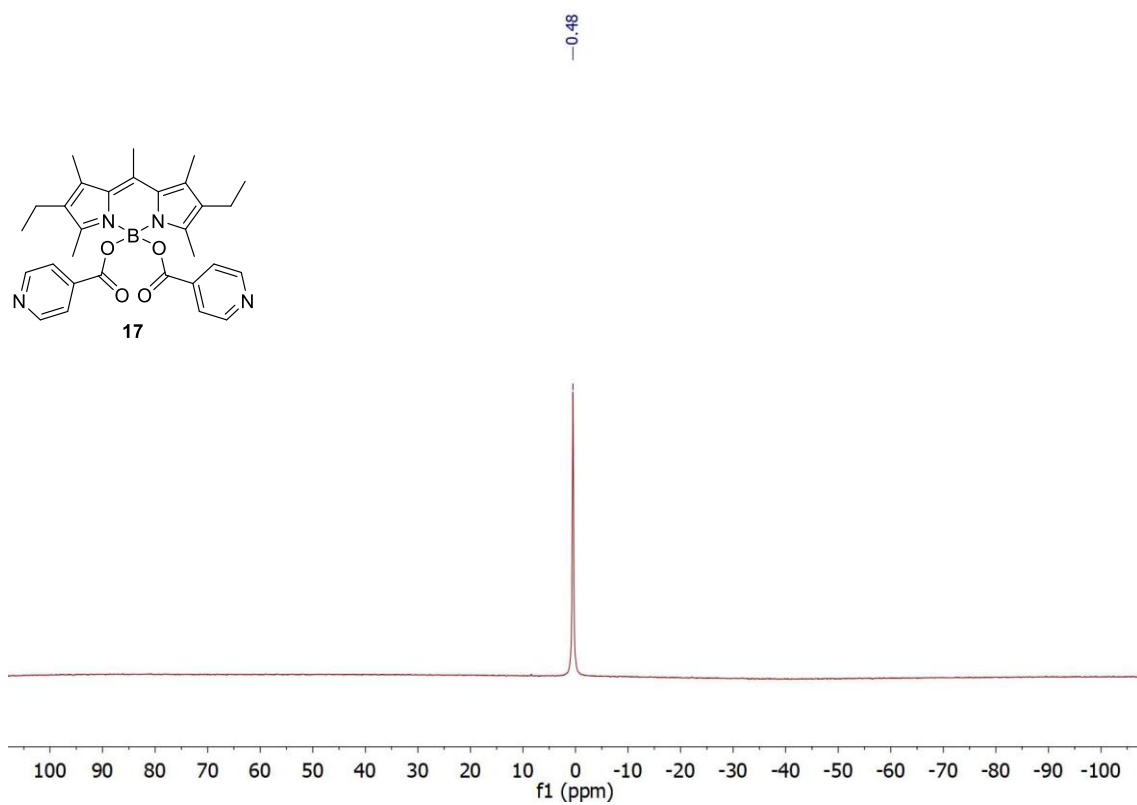



**<sup>1</sup>H NMR (300 MHz, CDCl<sub>3</sub>)**

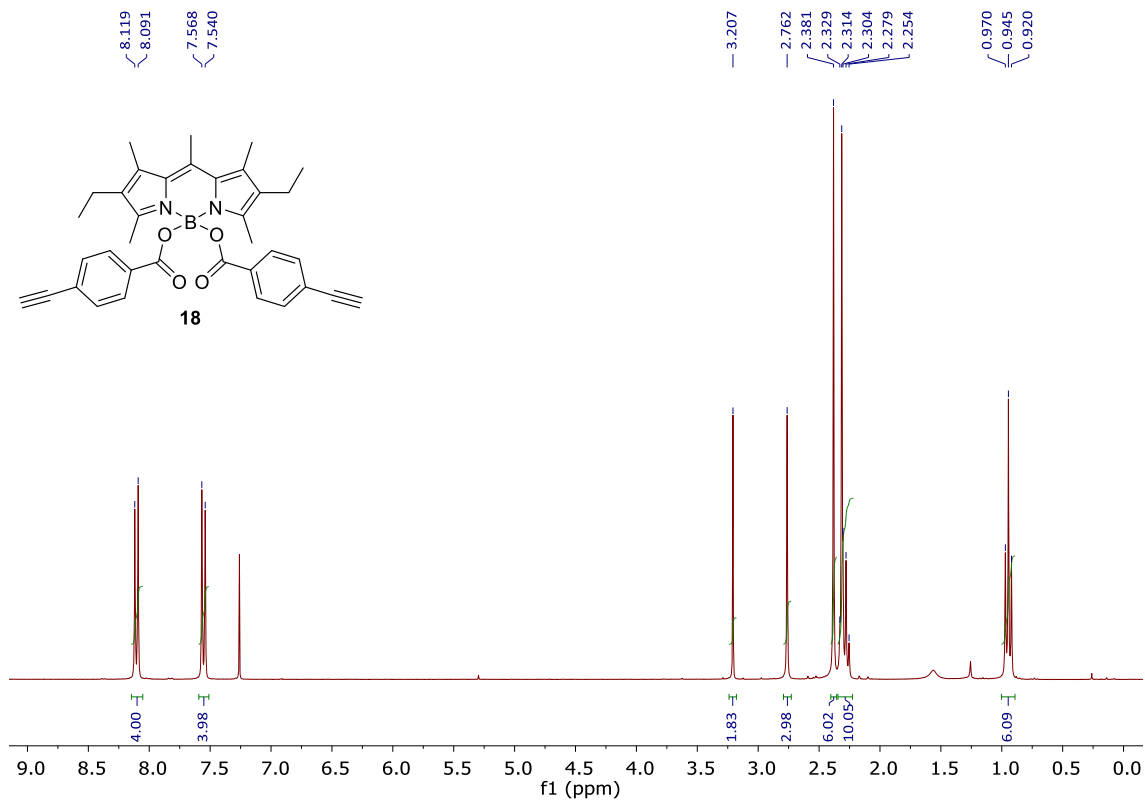

**<sup>13</sup>C{<sup>1</sup>H} NMR (75 MHz, CDCl<sub>3</sub>)**

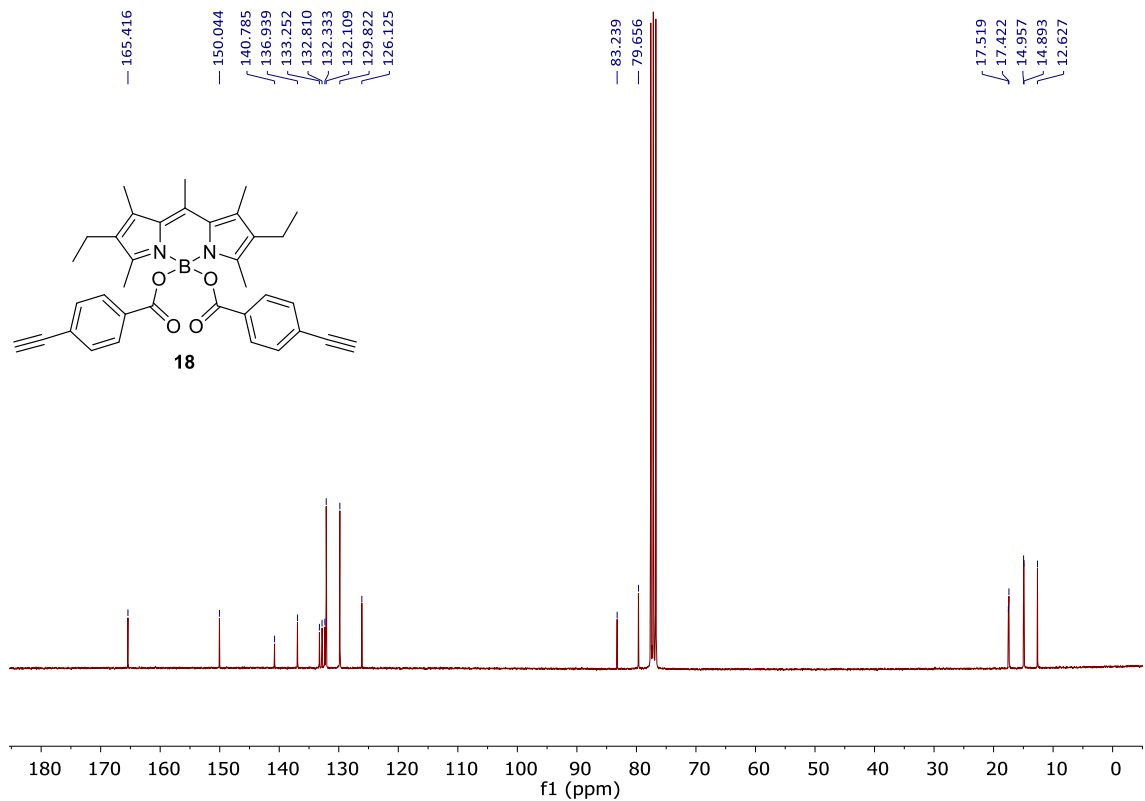

**$^{11}\text{B}$  NMR (160 MHz,  $\text{CDCl}_3$ )**

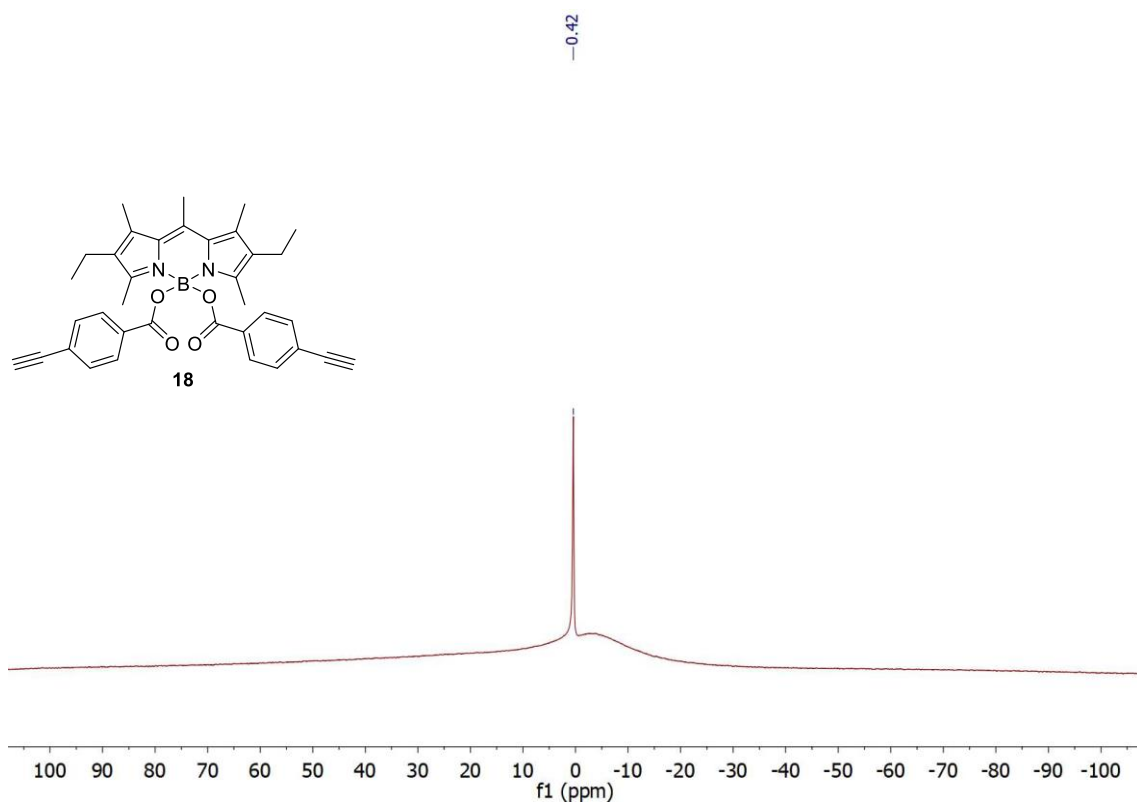

**<sup>1</sup>H NMR (500 MHz, CDCl<sub>3</sub>)**

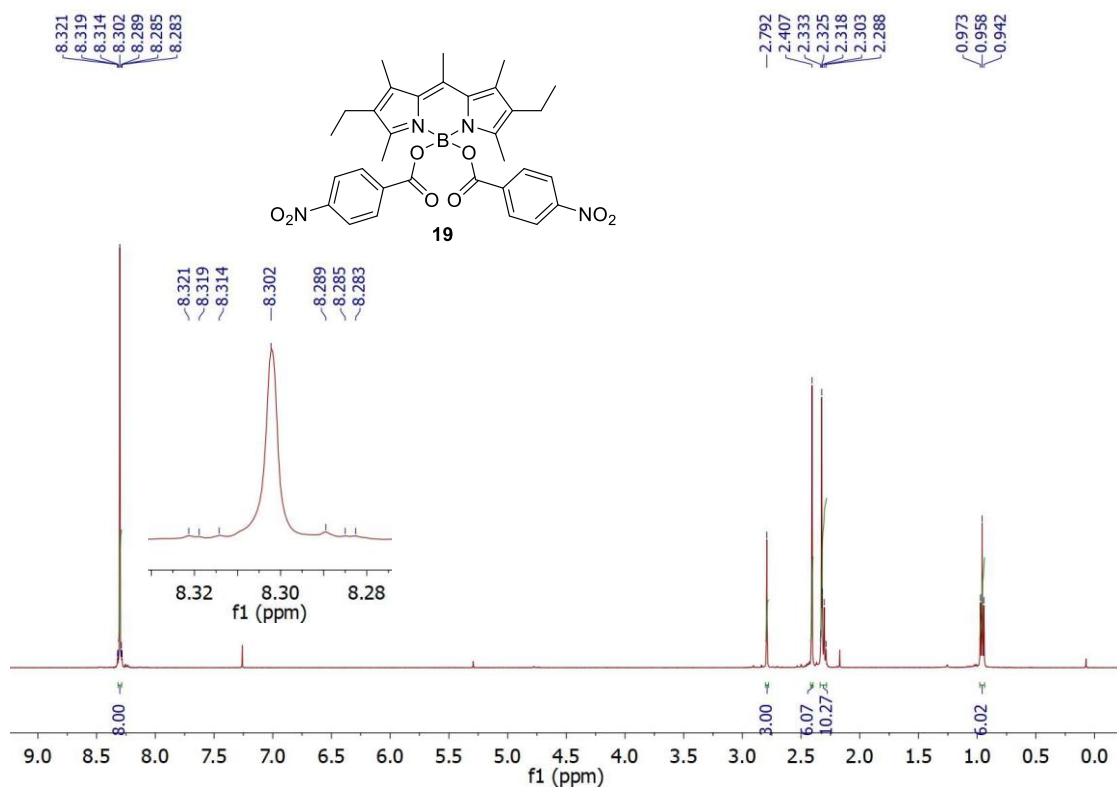

**<sup>13</sup>C{<sup>1</sup>H} NMR (75 MHz, CDCl<sub>3</sub>)**

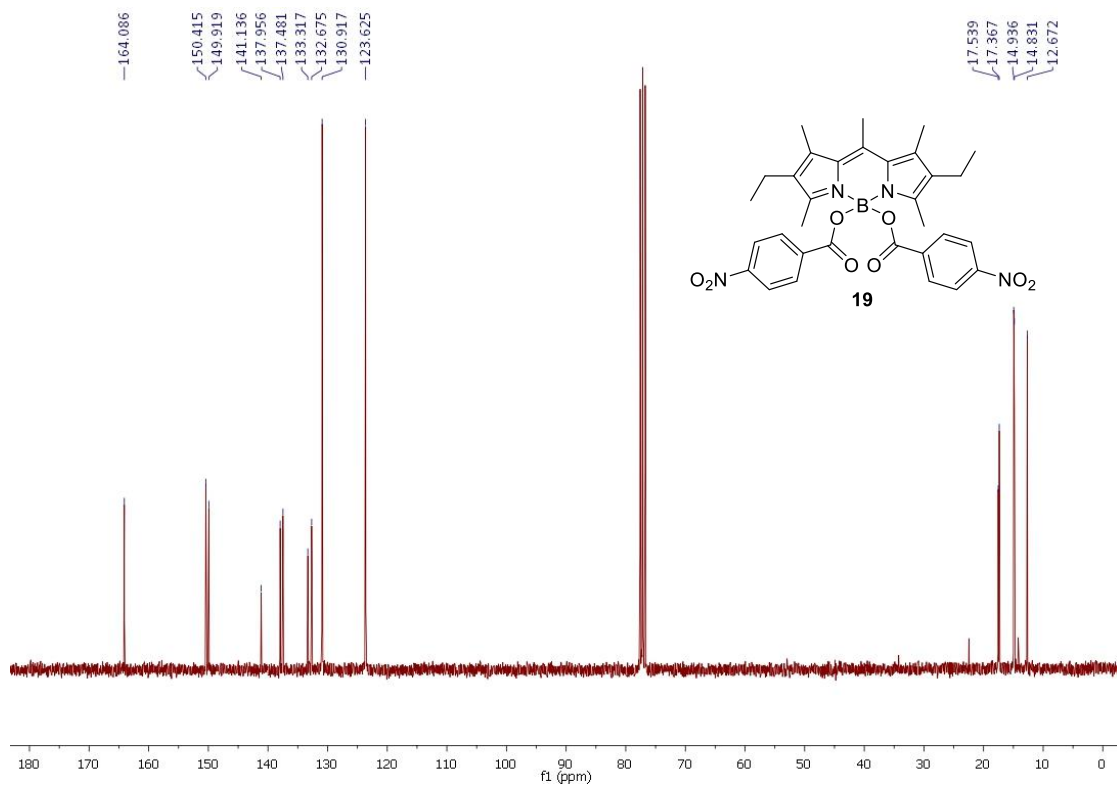

**$^{11}\text{B}$  NMR (160 MHz,  $\text{CDCl}_3$ )**

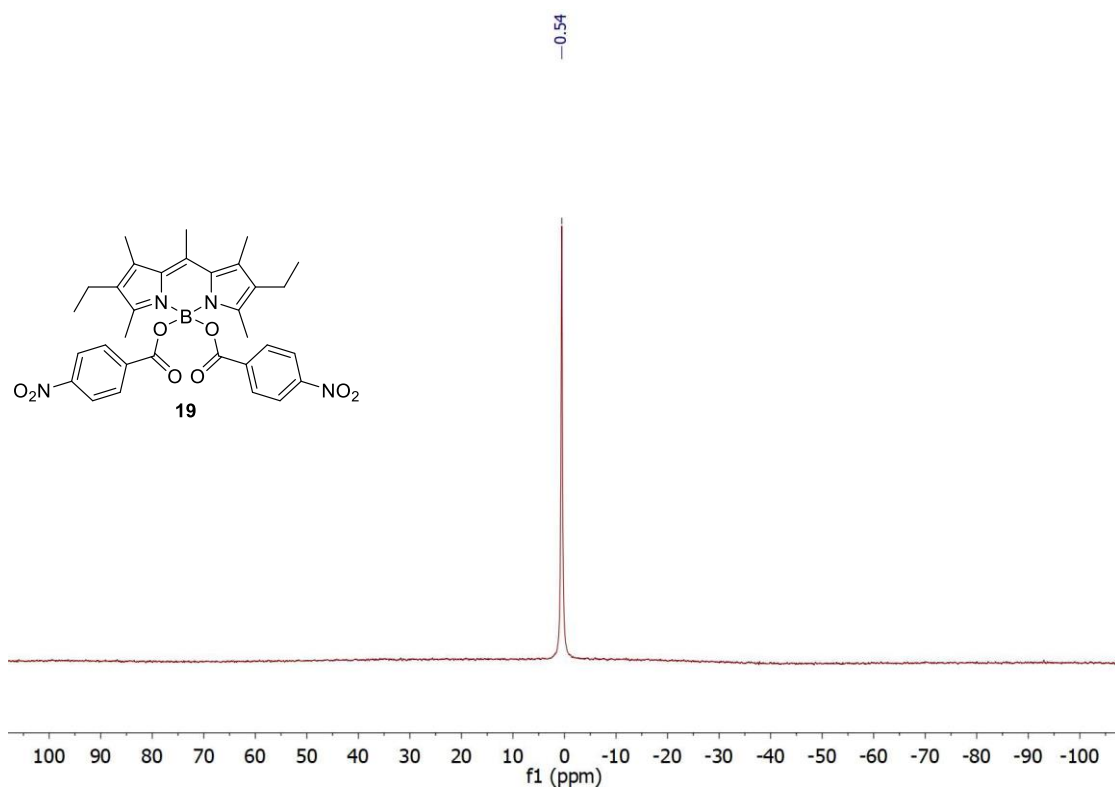

**<sup>1</sup>H NMR (300 MHz, CDCl<sub>3</sub>)**

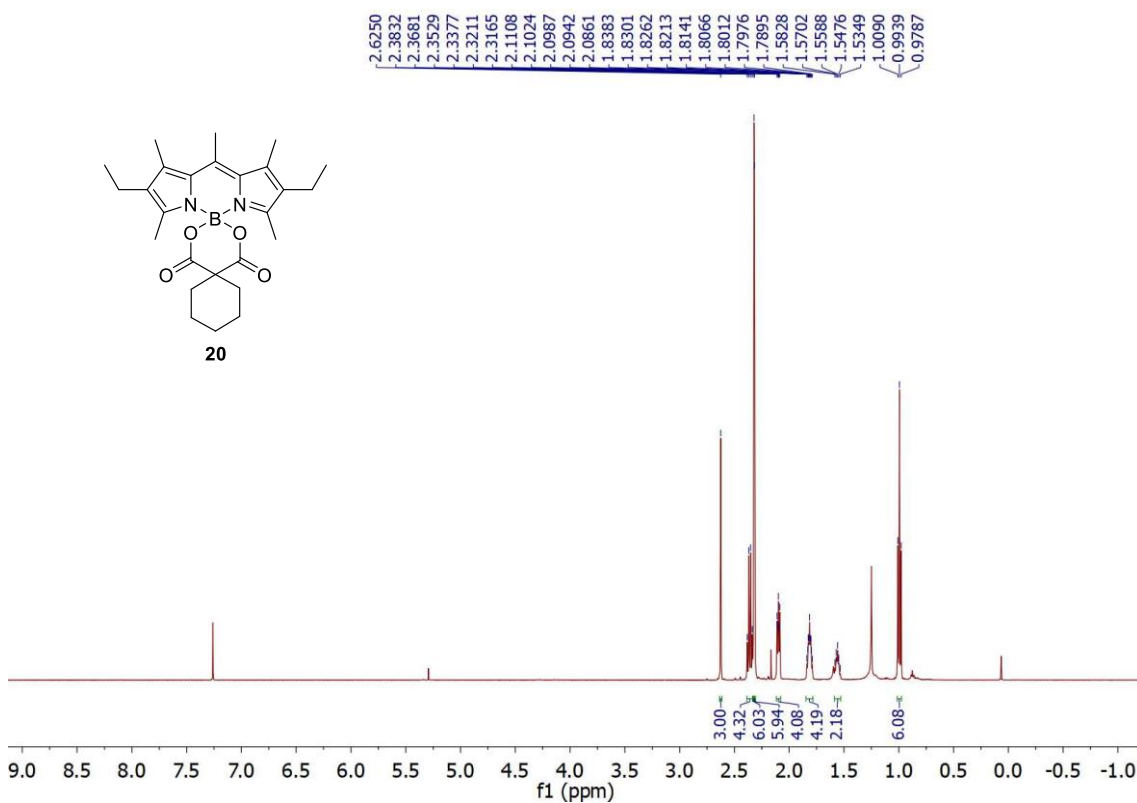

**<sup>13</sup>C{<sup>1</sup>H} NMR (75 MHz, CDCl<sub>3</sub>)**

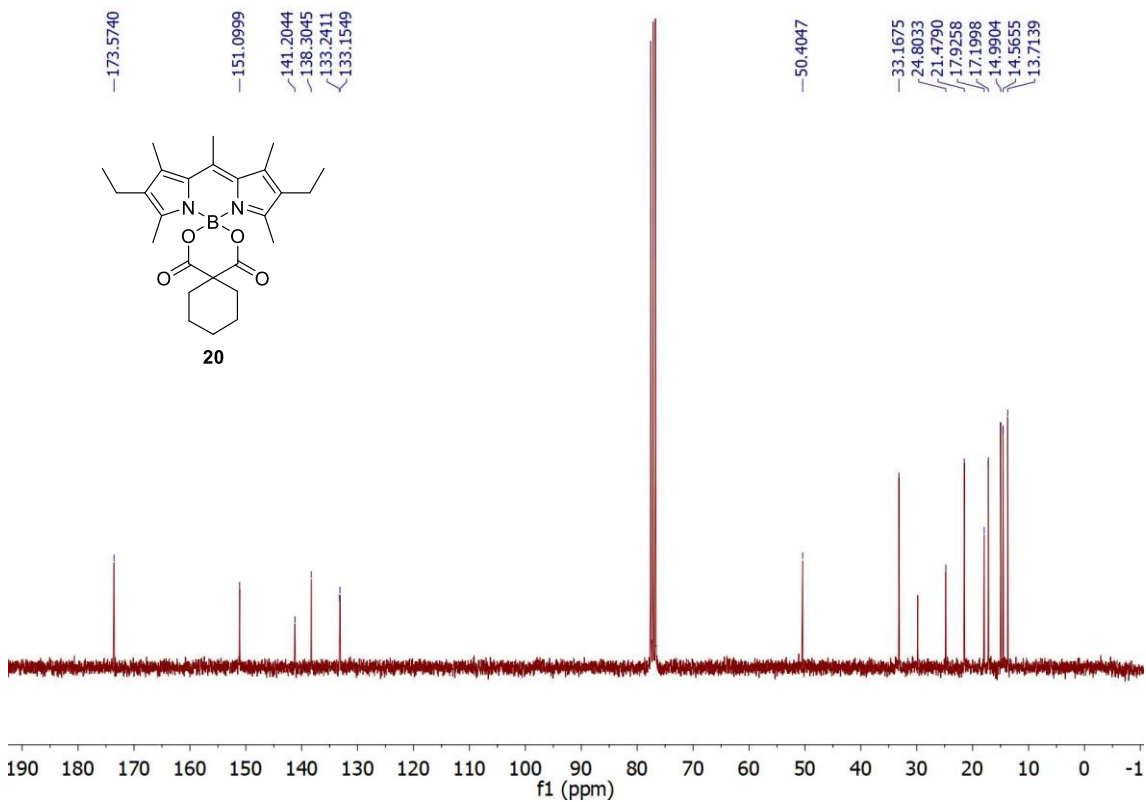

**$^{11}\text{B}$  NMR (160 MHz,  $\text{CDCl}_3$ )**

-1.11

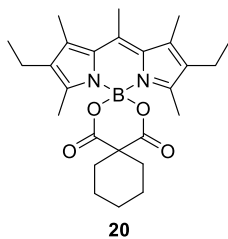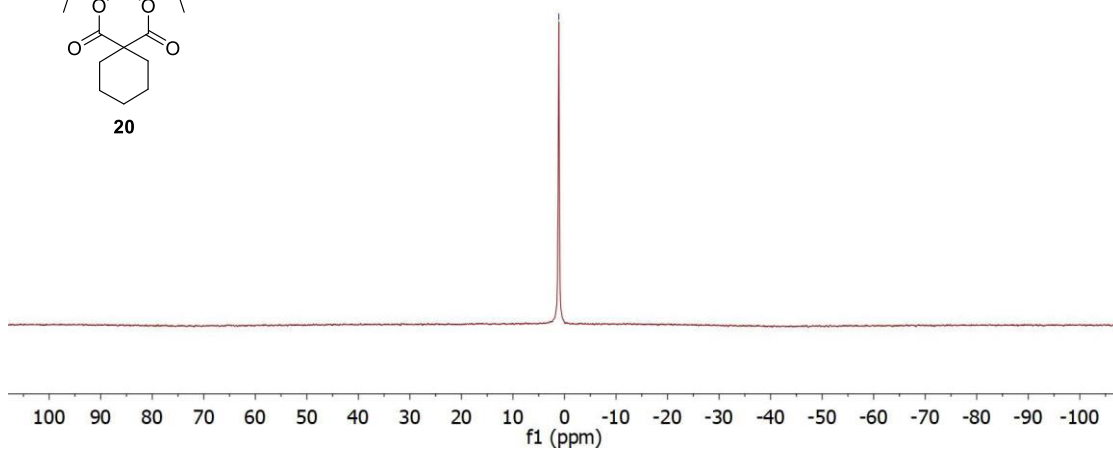

**$^1\text{H}$  NMR (300 MHz,  $\text{CDCl}_3$ )**

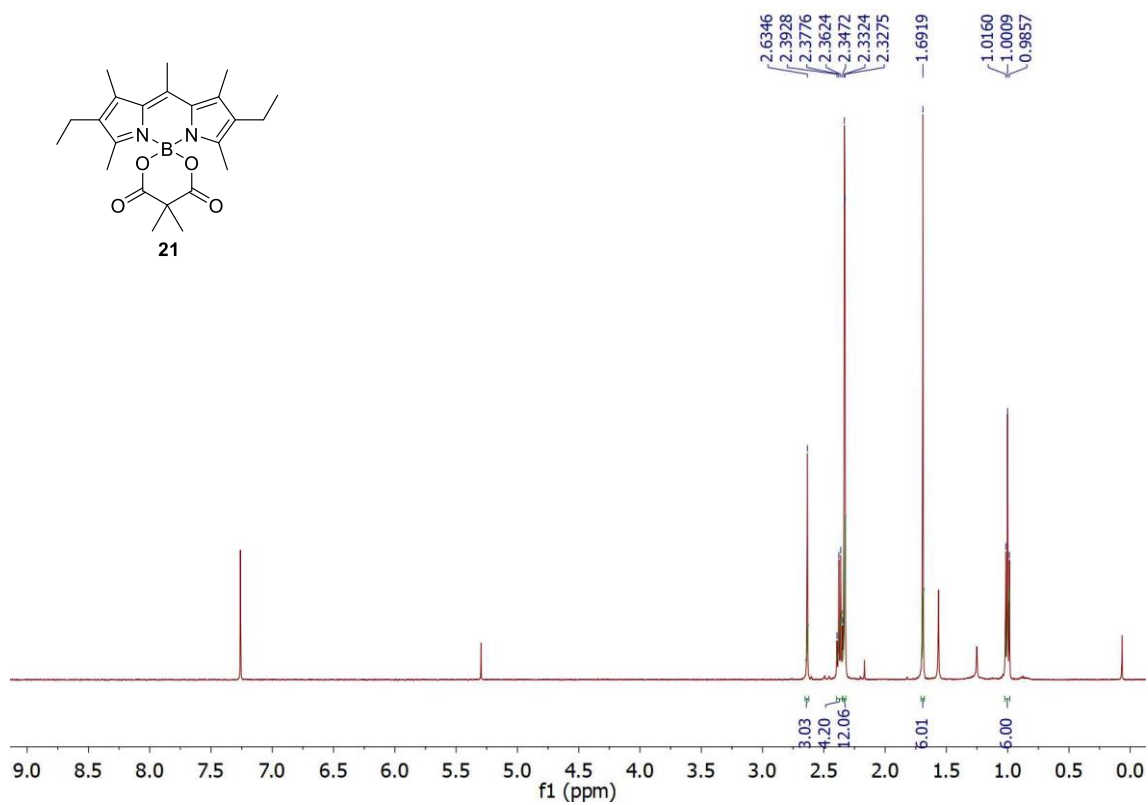

**$^{13}\text{C}\{^1\text{H}\}$  NMR (75 MHz,  $\text{CDCl}_3$ )**

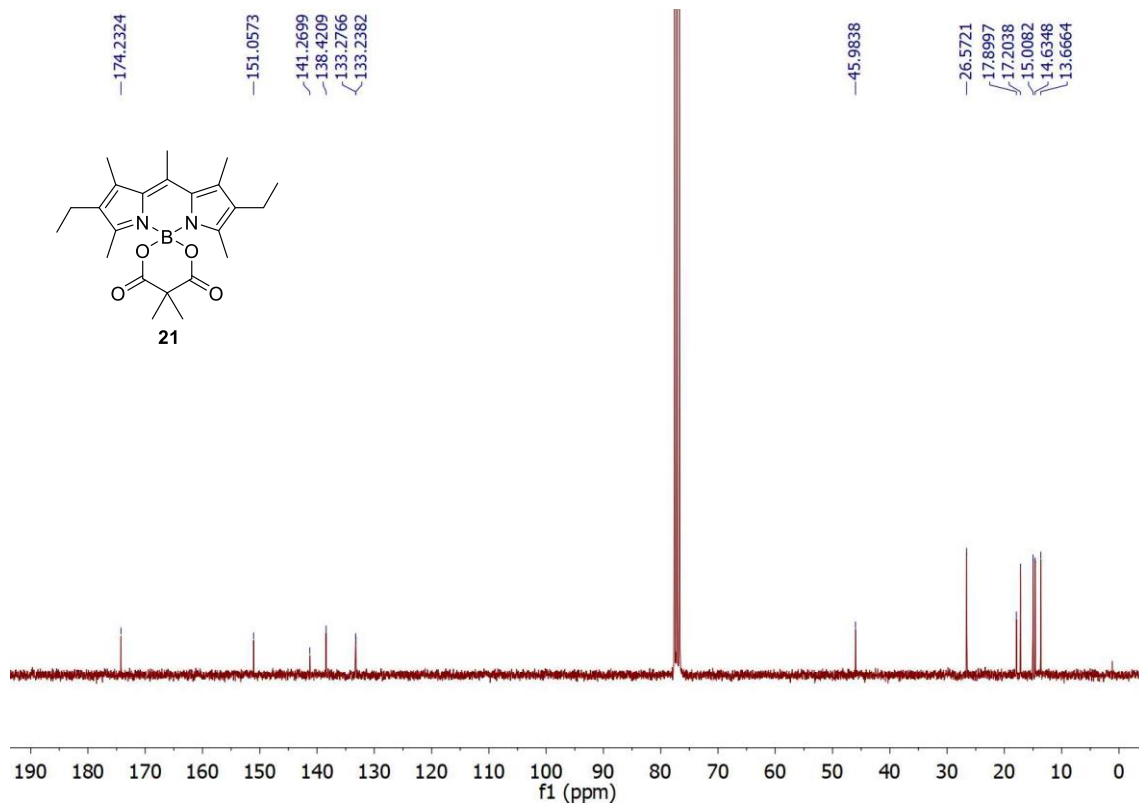

**$^{11}\text{B}$  NMR (160 MHz,  $\text{CDCl}_3$ )**

-1.07

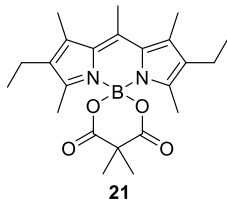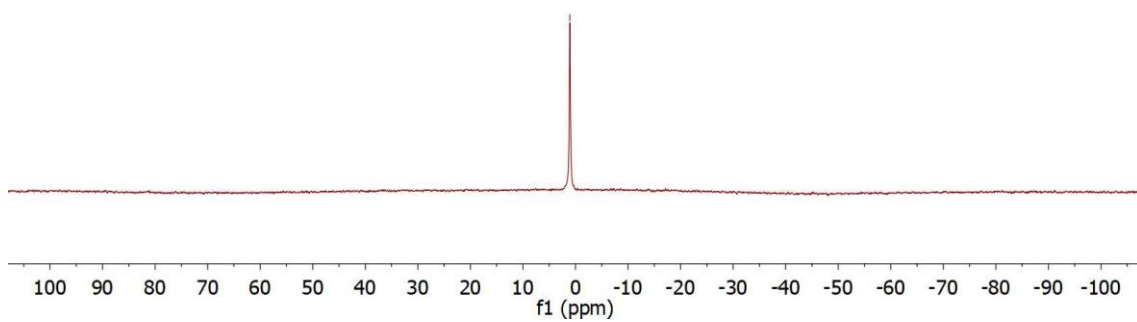



#### 4. Cartesian coordinates and computed energies. Tables S2-S3

**Table S2.** Cartesian coordinates and total computed energies (in hartrees) in the ground state (B3LYP/6-311g\*) and first singlet excited state (TD-B3LYP/6-311g\*) for **12**, **20** and **21**.

|           | $S_0$ (ground state) |             |             |             | $S_1$ (excited state) |             |             |             |
|-----------|----------------------|-------------|-------------|-------------|-----------------------|-------------|-------------|-------------|
| <b>12</b> | N                    | 1.28894100  | -0.09287800 | 0.38226100  | N                     | 1.22284900  | 0.21921700  | -0.46828100 |
|           | C                    | 1.42241300  | 0.95773700  | 1.29092900  | C                     | 1.50919200  | -0.93464400 | -1.23430200 |
|           | C                    | 0.30250000  | 1.72098100  | 1.66494600  | C                     | 0.54500100  | -1.90091800 | -1.45625600 |
|           | C                    | -0.98680500 | 1.34400400  | 1.26354500  | C                     | -0.85355600 | -1.54788300 | -1.17648100 |
|           | N                    | -1.18281800 | 0.26498700  | 0.38742700  | N                     | -1.16946400 | -0.43760000 | -0.33772700 |
|           | C                    | -2.27317200 | 1.77412100  | 1.71989100  | C                     | -2.01347200 | -2.02779300 | -1.70157500 |
|           | C                    | -3.21133300 | 0.92560500  | 1.13654400  | C                     | -3.10945600 | -1.19841800 | -1.12972900 |
|           | C                    | -2.50751300 | 0.00816600  | 0.31835900  | C                     | -2.52006400 | -0.23112400 | -0.32217700 |
|           | C                    | 2.50408100  | -0.63808400 | 0.17394300  | C                     | 2.35200400  | 0.97173700  | -0.39648900 |
|           | C                    | 3.45918400  | 0.00761400  | 0.99160200  | C                     | 3.37926900  | 0.35702800  | -1.15315500 |
|           | C                    | 2.79281800  | 1.01782600  | 1.68945000  | C                     | 2.87530900  | -0.83683700 | -1.67006900 |
|           | B                    | -0.01065000 | -0.34822200 | -0.43188100 | B                     | -0.03801500 | 0.33696400  | 0.41043400  |
|           | C                    | 0.49372900  | 2.94786900  | 2.52070500  | C                     | 0.88169300  | -3.28257500 | -1.93929300 |
|           | C                    | -3.11762000 | -1.11741100 | -0.44820800 | C                     | -3.22848300 | 0.84930300  | 0.42939600  |
|           | C                    | -2.60780900 | 2.86588500  | 2.69408100  | C                     | -2.27258600 | -3.09303300 | -2.71381400 |
|           | C                    | 3.43863800  | 1.91501600  | 2.70506300  | C                     | 3.59694900  | -1.76532500 | -2.59900500 |
|           | C                    | 2.76386600  | -1.75243100 | -0.78809400 | C                     | 2.47611200  | 2.22033900  | 0.41094800  |
|           | C                    | -4.70534700 | 0.95388700  | 1.31382700  | C                     | -4.56136600 | -1.44453700 | -1.33142100 |
|           | C                    | -5.42399400 | 1.88150600  | 0.31876500  | C                     | -5.14092700 | -2.48685300 | -0.34220500 |
|           | C                    | 4.92045200  | -0.34357400 | 1.06776900  | C                     | 4.77035700  | 0.89736300  | -1.33394800 |
|           | C                    | 5.81288200  | 0.51408100  | 0.15406900  | C                     | 5.79296200  | 0.31466800  | -0.34198200 |
|           | O                    | 0.25157700  | 0.38085100  | -1.70420900 | O                     | 0.33075300  | -0.33429500 | 1.69030100  |
|           | C                    | -0.55210400 | 0.52876200  | -2.75779100 | C                     | -0.44490700 | -0.54504800 | 2.75341100  |
|           | C                    | -0.33917600 | -2.73021000 | 0.16512300  | C                     | -0.70054700 | 2.65576200  | -0.18353300 |
|           | O                    | -0.21241400 | -1.76231800 | -0.75414900 | O                     | -0.40475900 | 1.71891200  | 0.72772000  |
|           | O                    | -1.67758000 | 0.09110700  | -2.85235900 | O                     | -1.62743700 | -0.28815700 | 2.82122500  |
|           | O                    | -0.30819500 | -2.55083500 | 1.36035400  | O                     | -0.73899900 | 2.46678700  | -1.37743800 |
|           | C                    | -0.52957500 | -4.08745400 | -0.49064000 | C                     | -0.99129700 | 3.99165000  | 0.47912400  |
|           | C                    | 0.11068100  | 1.34486000  | -3.85536200 | C                     | 0.33020600  | -1.17714400 | 3.89793300  |
|           | C                    | -0.66710500 | -5.24164000 | 0.50052200  | C                     | -1.33599700 | 5.11072200  | -0.50188100 |
|           | C                    | -0.85846700 | -6.59216100 | -0.19263600 | C                     | -1.62214400 | 6.43976400  | 0.20019700  |
|           | C                    | 0.43695600  | 2.78421300  | -3.42521600 | C                     | 0.93465400  | -2.54487500 | 3.54250300  |
|           | C                    | 1.08006000  | 3.59988800  | -4.54842900 | C                     | 1.69685900  | -3.16991500 | 4.71251800  |
|           | H                    | -0.26958800 | 3.69389400  | 2.31948200  | H                     | 0.21201100  | -4.02013200 | -1.48870000 |
|           | H                    | 0.44873100  | 2.70876700  | 3.58884700  | H                     | 0.80401700  | -3.40583900 | -3.02837200 |
|           | H                    | 1.45737400  | 3.41243600  | 2.33096000  | H                     | 1.89777600  | -3.56070700 | -1.06425900 |
|           | H                    | -2.62614100 | -1.25949800 | -1.40598500 | H                     | -2.80919100 | 0.97708100  | 1.42391400  |
|           | H                    | -3.05179200 | -2.04608200 | 0.13052200  | H                     | -3.18423100 | 1.80312900  | -0.10672800 |
|           | H                    | -4.17438600 | -0.92135600 | -0.63130800 | H                     | -4.28302600 | 0.59035600  | 0.53943500  |
|           | H                    | -3.66410200 | 2.82740900  | 2.96224600  | H                     | -2.84671700 | -2.68828700 | -3.55512000 |
|           | H                    | -2.03621200 | 2.79012300  | 3.62185900  | H                     | -1.36446800 | -3.52814300 | -3.11920800 |
|           | H                    | -2.42392100 | 3.86354600  | 2.28149200  | H                     | -2.87614700 | -3.90726300 | -2.29413500 |
| H         | 2.85886700           | 1.98847300  | 3.62739400  | H           | 2.95601700            | -2.11131800 | -3.41349800 |             |
| H         | 4.42611800           | 1.53704400  | 2.97445900  | H           | 4.45705800            | -1.26832700 | -3.05305500 |             |
| H         | 3.58437200           | 2.93504700  | 2.33219300  | H           | 3.98280000            | -2.65948300 | -2.09439700 |             |
| H         | 3.81415400           | -1.76414200 | -1.08187400 | H           | 3.52610500            | 2.48401400  | 0.54072300  |             |
| H         | 2.54000900           | -2.72608600 | -0.33844800 | H           | 1.98593300            | 3.07105300  | -0.07678600 |             |
| H         | 2.15471400           | -1.65963300 | -1.68564400 | H           | 2.02577800            | 2.11156500  | 1.39877500  |             |
| H         | -5.10617500          | -0.05926300 | 1.21673500  | H           | -5.11672200           | -0.50918400 | -1.22177500 |             |
| H         | -4.95276700          | 1.26164300  | 2.33481100  | H           | -4.74197200           | -1.79636500 | -2.35309400 |             |
| H         | -6.50697500          | 1.86344400  | 0.47368700  | H           | -6.20687300           | -2.63726600 | -0.53322900 |             |
| H         | -5.08596200          | 2.91556700  | 0.42893900  | H           | -4.63951900           | -3.45225400 | -0.44202100 |             |
| H         | -5.22573400          | 1.58342500  | -0.71407300 | H           | -5.01872900           | -2.15374900 | 0.69021700  |             |
| H         | 5.27038400           | -0.24727100 | 2.10107400  | H           | 5.11120000            | 0.69360700  | -2.35483700 |             |
| H         | 5.05860900           | -1.39988500 | 0.81807800  | H           | 4.76121800            | 1.98774500  | -1.24534600 |             |
| H         | 6.86374600           | 0.22198400  | 0.24075700  | H           | 6.79052600            | 0.72958700  | -0.51508800 |             |
| H         | 5.52096200           | 0.41143500  | -0.89467800 | H           | 5.51162600            | 0.53411300  | 0.69150800  |             |
| H         | 5.73720200           | 1.57440900  | 0.40958900  | H           | 5.85952800            | -0.77219100 | -0.43776900 |             |
| H         | -1.40821900          | -4.01919800 | -1.14306200 | H           | -1.80232800           | 3.83273800  | 1.19969900  |             |
| H         | 0.31307700           | -4.25111800 | -1.17309500 | H           | -0.12124800           | 4.25764300  | 1.09130300  |             |
| H         | 1.03662700           | 0.83843900  | -4.15171200 | H           | 1.13559600            | -0.49101100 | 4.18541500  |             |
| H         | -0.56305100          | 1.34268900  | -4.71480900 | H           | -0.35331800           | -1.26381400 | 4.74525300  |             |
| H         | 0.21756900           | -5.27210000 | 1.14396300  | H           | -0.51448800           | 5.23224900  | -1.21453900 |             |
| H         | -1.50813500          | -5.04215000 | 1.17145600  | H           | -2.20020100           | 4.81078300  | -1.10240100 |             |
| H         | -0.95504300          | -7.40170100 | 0.53593000  | H           | -1.86680000           | 7.22452900  | -0.52076900 |             |
| H         | -1.75941900          | -6.60110200 | -0.81458800 | H           | -2.46588800           | 6.35549500  | 0.89276300  |             |
| H         | -0.01134500          | -6.83497700 | -0.84247200 | H           | -0.75853600           | 6.78356300  | 0.77880700  |             |
| H         | -0.48460300          | 3.27735100  | -3.09476900 | H           | 0.13190300            | -3.22057300 | 3.22484100  |             |
| H         | 1.10000900           | 2.75308800  | -2.55656100 | H           | 1.59777600            | -2.42647400 | 2.68172300  |             |
| H         | 1.29937000           | 4.62073200  | -4.22293500 | H           | 2.11385800            | -4.14363000 | 4.44025200  |             |
| H         | 2.02172800           | 3.14983700  | -4.87874800 | H           | 2.52816500            | -2.53320500 | 5.03170700  |             |
| H         | 0.42379900           | 3.66635800  | -5.42177300 | H           | 1.04684400            | -3.32064000 | 5.58011900  |             |
| <b>E</b>  | <b>-1450.054860</b>  |             |             |             | <b>-1449.953099</b>   |             |             |             |
| <b>20</b> | N                    | -0.56806700 | 1.36574600  | 0.45013400  | N                     | 0.85911700  | 1.27377200  | -0.36010900 |
|           | C                    | -1.71274500 | 1.78781200  | -0.23520100 | C                     | 2.03727200  | 1.31786000  | 0.44019700  |
|           | C                    | -2.60909100 | 0.84623800  | -0.76774100 | C                     | 2.49954600  | 0.09757700  | 1.12743900  |
|           | C                    | -2.45595800 | -0.52114200 | -0.47949700 | C                     | 2.07371700  | -1.11269600 | 0.60686800  |

|           |   |                     |             |             |   |                     |             |             |
|-----------|---|---------------------|-------------|-------------|---|---------------------|-------------|-------------|
|           | N | -1.32226300         | -0.97866000 | 0.20139800  | N | 0.97523600          | -1.16161600 | -0.29205100 |
|           | C | -3.35312900         | -1.62285400 | -0.62277400 | C | 2.61183600          | -2.43807700 | 0.69770500  |
|           | C | -2.74482000         | -2.72046000 | -0.00901400 | C | 1.87219200          | -3.23632400 | -0.18065100 |
|           | C | -1.49064300         | -2.28974300 | 0.48276200  | C | 0.87183100          | -2.43101100 | -0.77608400 |
|           | C | 0.05692600          | 2.45403600  | 0.94902600  | C | 0.69733500          | 2.44640900  | -1.03505700 |
|           | C | -0.68002900         | 3.61707800  | 0.61995400  | C | 1.74634600          | 3.28950400  | -0.67617300 |
|           | C | -1.78200600         | 3.21132800  | -0.13666700 | C | 2.62291200          | 2.53130600  | 0.26119400  |
|           | B | -0.04233600         | -0.10012900 | 0.28783700  | B | -0.04150400         | -0.00951100 | -0.29408000 |
|           | C | -3.76053500         | 1.30618900  | -1.62449300 | C | 3.40743800          | 0.20452000  | 2.31706100  |
|           | C | -0.49019700         | -3.12835400 | 1.20972200  | C | -0.15518200         | -2.87239900 | -1.76667600 |
|           | C | -4.72276700         | -1.64150000 | -1.23662700 | C | 3.81606400          | -2.86818000 | 1.47922400  |
|           | C | -2.84263300         | 4.13308500  | -0.66284200 | C | 3.91327600          | 3.08230600  | 0.76991400  |
|           | C | 1.33382800          | 2.40220300  | 1.72356100  | C | -0.44882800         | 2.75194100  | -1.94766400 |
|           | C | -3.31479000         | -4.10487800 | 0.15024000  | C | 2.10720000          | -4.69041700 | -0.48466000 |
|           | C | -4.12399300         | -4.29832600 | 1.44430900  | C | 3.07144100          | -4.92511300 | -1.66188700 |
|           | C | -0.31295900         | 5.02320400  | 1.01024500  | C | 1.93523100          | 4.71535300  | -1.05261800 |
|           | C | 0.58515800          | 5.73350100  | -0.01703400 | C | 1.30125200          | 5.70073700  | -0.03941700 |
|           | O | 0.77836900          | -0.48170100 | 1.41806700  | O | -0.93137600         | -0.07622000 | -1.42904600 |
|           | C | 2.07782400          | -0.81323100 | 1.37189900  | C | -2.27179700         | -0.00956500 | -1.38888200 |
|           | C | 2.81399400          | -0.76124700 | 0.02055200  | C | -2.96372700         | -0.01784700 | -0.01345600 |
|           | C | 1.99256600          | -0.14959500 | -1.12463600 | C | 2.03099300          | 0.36432000  | 1.14763000  |
|           | O | 0.66241500          | -0.19559200 | -0.99654800 | O | -0.73836500         | 0.05199900  | 0.99779200  |
|           | C | 3.08856600          | -2.25240000 | -0.37807800 | C | -3.39175200         | -1.50634700 | 0.23436400  |
|           | C | 4.00500100          | -2.41874700 | -1.60177600 | C | -4.24569700         | -1.70088800 | 1.49954900  |
|           | C | 5.22594200          | -1.46593500 | -1.57961700 | C | -5.32479500         | -0.60404200 | 1.67817700  |
|           | C | 5.41015300          | -0.82245000 | -0.20256000 | C | -5.52581800         | 0.19748000  | 0.38900500  |
|           | C | 4.17572400          | -0.00325300 | 0.20148300  | C | -4.22959500         | 0.89889100  | -0.04613100 |
|           | O | 2.64594400          | -1.15413600 | 2.37938500  | O | -2.90053000         | 0.01183100  | -2.41680500 |
|           | O | 2.51057100          | 0.26519600  | -2.13234100 | O | -2.44185500         | 0.83583800  | 2.17874800  |
|           | H | -3.50143000         | 2.20266600  | -2.18119900 | H | 3.14880300          | 1.08185900  | 2.91645800  |
|           | H | -4.03994000         | 0.54510400  | -2.34782700 | H | 3.31288600          | -0.66611900 | 2.96483700  |
|           | H | -4.64916200         | 1.53499400  | -1.02590400 | H | 4.47143700          | 0.29686500  | 2.05848300  |
|           | H | -0.93722200         | -4.07586000 | 1.50936600  | H | 0.12917000          | -3.83056700 | -2.20275100 |
|           | H | 0.37467400          | -3.36289100 | 0.58160500  | H | -1.14361600         | -3.00657900 | -1.31271600 |
|           | H | -0.11153700         | -2.62534900 | 2.09888400  | H | -0.27853600         | -2.14842600 | -2.57207900 |
|           | H | -4.69152100         | -1.53180500 | -2.32578800 | H | 3.61333600          | -2.94670400 | 2.55354500  |
|           | H | -5.22517100         | -2.58620400 | -1.02755600 | H | 4.16781100          | -3.84761500 | 1.15101700  |
|           | H | -5.36371300         | -0.84500400 | -0.85156500 | H | 4.65015900          | -2.17034900 | 1.36447300  |
|           | H | -2.72024700         | 5.13533500  | -0.25089600 | H | 4.57709100          | 3.34410300  | -0.06240100 |
|           | H | -2.80019100         | 4.23308000  | -1.75264400 | H | 3.75671900          | 4.00482600  | 1.34119800  |
|           | H | -3.85136400         | 3.79991600  | -0.40888100 | H | 4.44860200          | 2.38537200  | 1.40804800  |
|           | H | 2.18471000          | 2.14219200  | 1.08521300  | H | -1.39902700         | 2.83165500  | -1.40903500 |
|           | H | 1.55197600          | 3.37627500  | 2.16037500  | H | -0.28311700         | 3.70861000  | -2.44494000 |
|           | H | 1.29221700          | 1.66468200  | 2.52517700  | H | -0.58114000         | 1.98773400  | -2.71375900 |
|           | H | -3.94799300         | -4.34197100 | -0.71003200 | H | 2.49879200          | -5.19054300 | 0.40632300  |
|           | H | -2.50630100         | -4.84177200 | 0.11781600  | H | 1.15398300          | -5.18424900 | -0.69771000 |
|           | H | -4.51570800         | -5.31721200 | 1.51583700  | H | 3.21441200          | -5.99413400 | -1.84525100 |
|           | H | -3.50893000         | -4.11282900 | 2.32892300  | H | 2.69130900          | -4.47428300 | -2.58233900 |
|           | H | -4.97130500         | -3.60869900 | 1.48843600  | H | 4.05153300          | -4.48309200 | -1.46426700 |
|           | H | -1.22172300         | 5.61428500  | 1.16087100  | H | 3.00466400          | 4.93903200  | -1.13297400 |
|           | H | 2.18471200          | 5.01954000  | 1.98345600  | H | 1.50267100          | 4.90244300  | -0.93961900 |
|           | H | 0.82619900          | 6.75012700  | 0.30724600  | H | 1.48446700          | 6.73226100  | -0.35128700 |
|           | H | 1.52549700          | 5.19517000  | -0.16151200 | H | 0.22225400          | 5.54945300  | 0.02933500  |
|           | H | 0.09508200          | 5.79849100  | -0.99206700 | H | 1.72002800          | 5.56936100  | 0.06069900  |
|           | H | 3.53852400          | -2.72528500 | 0.49761900  | H | -3.95324200         | -1.81889600 | -0.64977100 |
|           | H | 2.14037400          | -2.76747100 | -0.55829900 | H | -2.50610000         | -2.14549200 | 0.28604300  |
|           | H | 3.43281100          | -2.26362600 | -2.51879700 | H | -3.60066300         | -1.73234800 | -2.03892100 |
|           | H | 4.33543400          | -3.46289000 | -1.61825900 | H | -4.71251900         | -2.68896200 | 1.42719400  |
|           | H | 6.13342400          | -2.00300100 | -1.87219100 | H | -6.27027100         | -1.05117100 | 2.00024700  |
|           | H | 5.07607700          | -0.67230700 | -2.31568100 | H | 5.01350600          | 0.08316900  | 2.46841500  |
|           | H | 5.61460600          | -1.58940000 | 0.55327400  | H | -5.88551000         | -0.45841300 | -0.41257100 |
|           | H | 6.28328400          | -0.16164900 | -0.20654600 | H | -6.30448300         | 0.95396400  | 0.53076900  |
|           | H | 4.14440500          | 0.89966500  | -0.41197700 | H | -4.05071000         | 1.74537300  | 0.61951000  |
|           | H | 4.27603300          | 0.30126000  | 1.24392300  | H | -4.35386400         | 1.28495200  | -1.05786600 |
| <b>E</b>  |   | <b>-1447.621486</b> |             |             |   | <b>-1447.522958</b> |             |             |
| <b>21</b> | N | 1.23627600          | -0.36955400 | -0.15783900 | N | 1.21733400          | -0.33167200 | -0.12180200 |
|           | C | 1.21919000          | -1.63994200 | 0.42905900  | C | 1.21326200          | -1.58997400 | 0.54839200  |
|           | C | 0.00076300          | -2.23571500 | 0.79705100  | C | 0.00064200          | -2.12317500 | 1.06716300  |
|           | C | -1.21801200         | -1.64070400 | 0.42897900  | C | -1.21233200         | -1.59062400 | 0.54837500  |
|           | N | -1.23580900         | -0.37039400 | -0.15802800 | N | -1.21710100         | -0.33229600 | -0.12177500 |
|           | C | -2.55044700         | -2.15406100 | 0.40068600  | C | -2.49735500         | -2.14566100 | 0.43948000  |
|           | C | -3.34282600         | -1.18389900 | -0.21712900 | C | -3.27663800         | -1.22368200 | -0.30906700 |
|           | C | -2.50133200         | -0.09376100 | -0.54093500 | C | -2.44792600         | -0.12280400 | -0.64382400 |
|           | C | 2.50165200          | -0.09220100 | -0.54070500 | C | 2.44806500          | -0.12152800 | -0.64382400 |
|           | C | 3.34374900          | -1.18188700 | -0.21699000 | C | 3.27740200          | -1.22192200 | -0.30898600 |
|           | C | 2.55192100          | -2.15257000 | 0.40066800  | C | 2.49866900          | -2.14427200 | 0.43957300  |
|           | B | -0.00010800         | 0.57428900  | -0.02420500 | B | -0.00011900         | 0.61618300  | 0.01224500  |
|           | C | 0.00111000          | -3.53840500 | 1.55466800  | C | 0.00091800          | -3.23548300 | 2.07520300  |
|           | C | -2.91787800         | 1.17942500  | -1.20272300 | C | -2.84786900         | 1.09826600  | -1.40343300 |
|           | C | -3.04736200         | -3.49263600 | 0.86329000  | C | -2.97203400         | -3.48043200 | 0.93306400  |
|           | C | 3.04957700          | -3.49095700 | 0.86301600  | C | 2.97406400          | -3.47876200 | 0.93322800  |
|           | C | 2.91764000          | 1.18136300  | -1.20214000 | C | 2.84735400          | 1.09972400  | -1.40348100 |
|           | C | -4.81282900         | -1.27376300 | -0.52958400 | C | -4.71365100         | -1.38459100 | -0.69675900 |
|           | C | -5.11792700         | -1.87078500 | -1.91425600 | C | -4.90349000         | -2.08859600 | -2.05783600 |
|           | C | 4.81381500          | -1.27085000 | -0.52933900 | C | 4.71451400          | -1.38202600 | -0.69668900 |
|           | C | 5.11947500          | -1.86751700 | -1.91401600 | C | 4.90475100          | -2.08586600 | -2.05778700 |

|   |   |              |             |             |   |              |             |             |
|---|---|--------------|-------------|-------------|---|--------------|-------------|-------------|
|   | O | -0.00044100  | 1.58227000  | -1.06153300 | O | -0.00040500  | 1.61671400  | -1.03268900 |
|   | C | -0.00104200  | 2.91197800  | -0.87834800 | C | -0.00085300  | 2.94665100  | -0.86078600 |
|   | C | -0.00136400  | 3.46526200  | 0.55671500  | C | -0.00109000  | 3.51026100  | 0.56940800  |
|   | C | -0.00123600  | 2.41244900  | 1.68013600  | C | -0.00090500  | 2.46831400  | 1.70267300  |
|   | O | -0.00034100  | 1.12496300  | 1.33717300  | O | -0.00028100  | 1.17675100  | 1.37225100  |
|   | C | -1.25602500  | 4.35316000  | 0.73182900  | C | -1.25944100  | 4.39426100  | 0.73461200  |
|   | C | 1.25301200   | 4.35355000  | 0.73208700  | C | 1.25685900   | 4.39481700  | 0.73478800  |
|   | O | -0.00132900  | 3.65022100  | -1.83112300 | O | -0.00109400  | 3.67755500  | -1.81951900 |
|   | O | -0.00186100  | 2.75205600  | 2.83731400  | O | -0.00117100  | 2.81834400  | 2.85687000  |
|   | H | 0.00094700   | -4.40259100 | 0.88119100  | H | 0.00106700   | -4.23900800 | 1.62939100  |
|   | H | 0.87675200   | -3.62084300 | 2.19275300  | H | 0.87919400   | -3.17390200 | 2.71951400  |
|   | H | -0.87416800  | -3.62096000 | 2.19325000  | H | -0.87730500  | -3.17422200 | 2.71962400  |
|   | H | -3.92422400  | 1.08367500  | -1.60937300 | H | -3.83341700  | 0.96164400  | -1.84879800 |
|   | H | -2.93445300  | 2.01503300  | -0.49594300 | H | -2.90366300  | 1.98473100  | -0.76044400 |
|   | H | -2.24175500  | 1.45594100  | -2.01114700 | H | -2.13929700  | 1.33466700  | -2.19859400 |
|   | H | -3.04012500  | -3.58351700 | 1.95460000  | H | -3.18471800  | -3.47739600 | 2.00801800  |
|   | H | -4.07530100  | -3.65497400 | 0.53836500  | H | -3.89303300  | -3.77851100 | 0.42912400  |
|   | H | -2.45132500  | -4.31843600 | 0.46792300  | H | -2.23861200  | -4.26934200 | 0.75412800  |
|   | H | 4.07731400   | -3.65303300 | 0.53729500  | H | 3.89522200   | -3.77637300 | 0.42930100  |
|   | H | 3.04322400   | -3.58171800 | 1.95435000  | H | 3.18674800   | -3.47555900 | 2.00818300  |
|   | H | 2.45349700   | -4.31696500 | 0.46818600  | H | 2.24106200   | -4.26807300 | 0.75433500  |
|   | H | 2.93538900   | 2.01639200  | -0.49466200 | H | 2.90262100   | 1.98625300  | -0.76053700 |
|   | H | 3.92345300   | 1.08565200  | -1.61013400 | H | 3.83299700   | 0.96363200  | -1.84879600 |
|   | H | 2.24058600   | 1.45864300  | -2.00948400 | H | 2.13868100   | 1.33568600  | -2.19868300 |
|   | H | -5.31502600  | -1.86931400 | 0.23869300  | H | -5.24095000  | -1.95323000 | 0.07544200  |
|   | H | -5.26605800  | -0.28018700 | -0.45800000 | H | -5.20392000  | -0.40696200 | -0.73214200 |
|   | H | -6.19577300  | -1.91533000 | -2.09565800 | H | -5.96650800  | -2.18942500 | -2.29483400 |
|   | H | -4.66819900  | -1.27390200 | -2.71224300 | H | -4.42877700  | -1.52442000 | -2.86414300 |
|   | H | -4.71969800  | -2.88505100 | -2.00455600 | H | -4.46138400  | -3.08796100 | -2.05214700 |
|   | H | 5.26645800   | -0.27700800 | -0.45761000 | H | 5.20424400   | -0.40412300 | -0.73202100 |
|   | H | 5.31628100   | -1.86617600 | 0.23895000  | H | 5.24212500   | -1.95039600 | 0.07549700  |
|   | H | 6.19737700   | -1.91113000 | -2.09532000 | H | 5.96782400   | -2.18609300 | -2.29479800 |
|   | H | 4.72211400   | -2.88211100 | -2.00444600 | H | 4.46320400   | -3.08547900 | -2.05213700 |
|   | H | 4.66932000   | -1.27092500 | -2.71197800 | H | 4.42972000   | -1.52192900 | -2.86407500 |
|   | H | -1.26512000  | 5.13241200  | -0.03054300 | H | -1.26783600  | 5.17040400  | -0.03091400 |
|   | H | -2.18069300  | 3.77689300  | 0.64310200  | H | -2.18004000  | 3.81091600  | 0.64084900  |
|   | H | -1.24014300  | 4.80785000  | 1.72214500  | H | -1.25241200  | 4.85281400  | 1.72332300  |
|   | H | 2.17786100   | 3.77756700  | 0.64343600  | H | 2.17773100   | 3.81187500  | 0.64119900  |
|   | H | 1.26197400   | 5.13285000  | -0.03024000 | H | 1.26503600   | 5.17094300  | -0.03075900 |
|   | H | 1.23682600   | 4.80818500  | 1.72242400  | H | 1.24946300   | 4.85340500  | 1.72348200  |
| E |   | -1330.872310 |             |             |   | -1330.772813 |             |             |

**Table S3.** Cartesian coordinates and total computed energy (in hartrees) in the ground state (B3LYP/6-311g\*) for **19**.

|           |          |                     |             |             |  |
|-----------|----------|---------------------|-------------|-------------|--|
| <b>19</b> | N        | 0.03509900          | -1.47055600 | 1.24707900  |  |
|           | C        | 0.06385300          | -2.86730100 | 1.22124400  |  |
|           | C        | 0.04326500          | -3.56094300 | 0.00027400  |  |
|           | C        | 0.06364900          | -2.86735500 | -1.22073300 |  |
|           | N        | 0.03518000          | -1.47061800 | -1.24673000 |  |
|           | C        | 0.10631200          | -3.31932000 | -2.57570300 |  |
|           | C        | 0.08680700          | -2.18094600 | -3.38728200 |  |
|           | C        | 0.03478300          | -1.05840700 | -2.53315100 |  |
|           | C        | 0.03468700          | -1.05819300 | 2.53344200  |  |
|           | C        | 0.08705800          | -2.18061400 | 3.38771100  |  |
|           | C        | 0.10676700          | -3.31909300 | 2.57627400  |  |
|           | B        | 0.03980400          | -0.57181100 | 0.00011800  |  |
|           | C        | -0.02777000         | -5.06543900 | 0.00017300  |  |
|           | C        | -0.04664200         | 0.37811000  | -2.93810700 |  |
|           | C        | 0.20149700          | -4.72301700 | -3.09814200 |  |
|           | C        | 0.20259900          | -4.72270300 | 3.09885900  |  |
|           | C        | -0.04706400         | 0.37836100  | 2.93817300  |  |
|           | C        | 0.08766200          | -2.13091400 | -4.89060400 |  |
|           | C        | -1.31679200         | -2.22017200 | -5.51208400 |  |
|           | C        | 0.08812800          | -2.13027200 | 4.89102500  |  |
|           | C        | -1.31636300         | -2.21774700 | 5.51266500  |  |
|           | O        | -1.09382000         | 0.38808800  | 0.00009100  |  |
|           | C        | -2.36281100         | -0.01489400 | -0.00007000 |  |
|           | C        | 2.46647500          | -0.09179700 | 0.00002300  |  |
|           | O        | 1.21079900          | 0.35465700  | 0.00014500  |  |
|           | O        | -2.72849000         | -1.16982100 | -0.00014700 |  |
|           | O        | 2.79186400          | -1.25844800 | 0.00003700  |  |
|           | C        | 3.48030800          | 1.01944200  | -0.00012800 |  |
|           | C        | -3.33735900         | 1.13114300  | -0.00013000 |  |
|           | C        | -2.91732600         | 2.46563300  | -0.00010300 |  |
|           | C        | -3.85144500         | 3.49484200  | -0.00018000 |  |
|           | C        | -5.20324700         | 3.16869900  | -0.00024300 |  |
|           | C        | -5.64748200         | 1.84996000  | -0.00025200 |  |
|           | C        | -4.70398600         | 0.83180400  | -0.00021800 |  |
|           | C        | 3.10927000          | 2.36837000  | 0.00001400  |  |
|           | C        | 4.07985700          | 3.36327000  | -0.00002000 |  |
|           | C        | 5.41891800          | 2.98858900  | -0.00030200 |  |
|           | C        | 5.81499300          | 1.65460900  | -0.00052300 |  |
|           | C        | 4.83530200          | 0.67131600  | -0.00036700 |  |
|           | N        | -6.20313800         | 4.26165900  | -0.00029000 |  |
|           | N        | 6.45754300          | 4.04470100  | -0.00039300 |  |
|           | O        | -7.38508500         | 3.94684800  | 0.00059300  |  |
|           | O        | -5.78495200         | 5.41128900  | -0.00119200 |  |
|           | O        | 7.62736700          | 3.68747300  | -0.00269700 |  |
|           | O        | 6.08113300          | 5.20870800  | 0.00182300  |  |
|           | H        | -0.55396800         | -5.43888900 | -0.87248500 |  |
|           | H        | 0.97403300          | -5.50955700 | -0.00153900 |  |
|           | H        | -0.55123200         | -5.43931300 | 0.87423700  |  |
|           | H        | 0.43587700          | 1.03367100  | -2.21598400 |  |
|           | H        | 0.42208700          | 0.52965500  | -3.91172900 |  |
|           | H        | -1.08933200         | 0.70249300  | -3.02721900 |  |
|           | H        | 0.44699500          | -4.71791300 | -4.16082200 |  |
|           | H        | 0.97293800          | -5.30597200 | -2.59128600 |  |
|           | H        | -0.74146200         | -5.27138100 | -2.99708500 |  |
|           | H        | 0.97412800          | -5.30540600 | 2.59184900  |  |
|           | H        | 0.44842300          | -4.71739400 | 4.16146100  |  |
|           | H        | -0.74019100         | -5.27143400 | 2.99819800  |  |
|           | H        | 0.41972300          | 0.52979300  | 3.91273200  |  |
|           | H        | 0.43714600          | 1.03372200  | 2.21697000  |  |
|           | H        | -1.08980600         | 0.70314900  | 3.02507400  |  |
|           | H        | 0.56977500          | -1.20848800 | -5.22905500 |  |
|           | H        | 0.70791700          | -2.94037600 | -5.28844900 |  |
|           | H        | -1.26745000         | -2.17739900 | -6.60402200 |  |
|           | H        | -1.81382800         | -3.15340000 | -5.23440400 |  |
|           | H        | -1.95319300         | -1.39853200 | -5.17288100 |  |
|           | H        | 0.70741700          | -2.94040800 | 5.28896700  |  |
|           | H        | 0.57143500          | -1.20838000 | 5.22925200  |  |
|           | H        | -1.26686000         | -2.17486300 | 6.60459200  |  |
|           | H        | -1.95184600         | -1.39541500 | 5.17341600  |  |
|           | H        | -1.81450600         | -3.15043900 | 5.23516400  |  |
|           | H        | -1.85861200         | 2.68915900  | -0.00002800 |  |
|           | H        | -3.55308300         | 4.53443500  | -0.00020500 |  |
|           | H        | -6.70903000         | 1.64317400  | -0.00027000 |  |
|           | H        | -5.00773000         | -0.20778400 | -0.00025400 |  |
|           | H        | 2.05969500          | 2.63193400  | 0.00014500  |  |
|           | H        | 3.81918000          | 4.41293300  | 0.00023800  |  |
|           | H        | 6.86833800          | 1.40944300  | -0.00084500 |  |
|           | H        | 5.10125800          | -0.37853000 | -0.00043500 |  |
|           | <b>E</b> | <b>-2085.445092</b> |             |             |  |
